# Supplementary material for: Utilisation of a thoracic oncology database to capture radiological and pathological images for evaluation of response to chemotherapy in patients with malignant pleural mesothelioma
Source: PubMed Central journal article supplement — BMJ Open. 2012 Oct 26;2(5):e001620. doi: 10.1136/bmjopen-2012-001620 (PMC3488720; doi:10.1136/bmjopen-2012-001620), 2012-10-26
Supplement: bmjopen-2012-001620.draft_revisions.pdf [file bmjopen-2012-001620.draft_revisions.pdf]

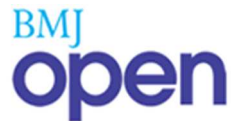

**Utilization of a Thoracic Oncology Database to Capture Radiological and Pathological Images for Evaluation of Response to Chemotherapy in Patients with Malignant Pleural Mesothelioma**

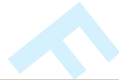

|                                 |                                                                                                                                                                                                                                                                                                                                                                                                                                                                                                                                                                                                                                                                                                                                                                                                                                                                                                                                                                                                                                                                                |
|---------------------------------|--------------------------------------------------------------------------------------------------------------------------------------------------------------------------------------------------------------------------------------------------------------------------------------------------------------------------------------------------------------------------------------------------------------------------------------------------------------------------------------------------------------------------------------------------------------------------------------------------------------------------------------------------------------------------------------------------------------------------------------------------------------------------------------------------------------------------------------------------------------------------------------------------------------------------------------------------------------------------------------------------------------------------------------------------------------------------------|
| Journal:                        | <i>BMJ Open</i>                                                                                                                                                                                                                                                                                                                                                                                                                                                                                                                                                                                                                                                                                                                                                                                                                                                                                                                                                                                                                                                                |
| Manuscript ID:                  | bmjopen-2012-001620                                                                                                                                                                                                                                                                                                                                                                                                                                                                                                                                                                                                                                                                                                                                                                                                                                                                                                                                                                                                                                                            |
| Article Type:                   | Research                                                                                                                                                                                                                                                                                                                                                                                                                                                                                                                                                                                                                                                                                                                                                                                                                                                                                                                                                                                                                                                                       |
| Date Submitted by the Author:   | 06-Jun-2012                                                                                                                                                                                                                                                                                                                                                                                                                                                                                                                                                                                                                                                                                                                                                                                                                                                                                                                                                                                                                                                                    |
| Complete List of Authors:       | Carey, George; University of Chicago, Medicine<br>Kazantsev, Stephanie; University of Chicago, Pritzker School of Medicine<br>Surati, Mosmi; University of Michigan, Medicine<br>Rolle, Cleo; University of Chicago, Medicine<br>Kanteti, Archana; University of Illinois College of Medicine,<br>Sadiq, Ahad; University of Chicago, Medicine<br>Bahroos, Neil; University of Chicago, Center for Research Informatics<br>Raumann, Brigitte; University of Chicago, Center for Research Informatics<br>Madduri, Ravi; University of Chicago, Center for Research Informatics<br>Dave, Paul; University of Chicago, Center for Research Informatics<br>Starkey, Adam; University of Chicago, Radiology<br>Hensing, Thomas; University of Chicago, Medicine<br>Husain, Aliya; University of Chicago, Pathology<br>Vokes, Everett; University of Chicago, Medicine<br>Vigneswaran, Wickii; University of Chicago, Surgery<br>Armato, Samuel; University of Chicago, Radiology<br>Kindler, Hedy; University of Chicago, Medicine<br>Salgia, Ravi; University of Chicago, Medicine |
| <b>Primary Subject Heading</b>: | Oncology                                                                                                                                                                                                                                                                                                                                                                                                                                                                                                                                                                                                                                                                                                                                                                                                                                                                                                                                                                                                                                                                       |
| Secondary Subject Heading:      | Respiratory medicine, Radiology and imaging, Oncology, Health informatics                                                                                                                                                                                                                                                                                                                                                                                                                                                                                                                                                                                                                                                                                                                                                                                                                                                                                                                                                                                                      |
| Keywords:                       | BASIC SCIENCES, Adult oncology < ONCOLOGY, Information management < BIOTECHNOLOGY & BIOINFORMATICS                                                                                                                                                                                                                                                                                                                                                                                                                                                                                                                                                                                                                                                                                                                                                                                                                                                                                                                                                                             |
|                                 |                                                                                                                                                                                                                                                                                                                                                                                                                                                                                                                                                                                                                                                                                                                                                                                                                                                                                                                                                                                                                                                                                |

SCHOLARONE™  
Manuscripts

# Utilization of a Novel Thoracic Oncology Database in Evaluation of Response to Chemotherapy, Radiology, and Pathology in Malignant Pleural Mesothelioma

George B. Carey<sup>1</sup>, Stephanie Kazantsev<sup>2</sup>, Mosmi Surati<sup>3</sup>, Cleo E. Rolle<sup>1</sup>, Archana Kanteti<sup>4</sup>, Ahad Sadiq<sup>1</sup>, Neil Bahroos<sup>5</sup>, Brigitte Raumann<sup>5</sup>, Ravi Madduri<sup>6</sup>, Paul Dave<sup>6</sup>, Adam Starkey<sup>7</sup>, Thomas Hensing<sup>1</sup>, Aliya N. Husain<sup>8</sup>, Everett E. Vokes<sup>1</sup>, Wickii Vigneswaran<sup>9</sup>, Samuel G. Armato, III<sup>7</sup>, Hedy L. Kindler<sup>1</sup>, Ravi Salgia<sup>1</sup>

<sup>1</sup>Section of Hematology/Oncology, Department of Medicine, University of Chicago, Chicago, Illinois, USA

<sup>2</sup>Pritzker School of Medicine, University of Chicago, Chicago, Illinois, USA

<sup>3</sup>Department of Medicine, University of Michigan, Ann Arbor, Michigan, USA

<sup>4</sup>University of Illinois College of Medicine, University of Illinois at Chicago, Chicago, Illinois, USA

<sup>5</sup>Center for Research Informatics, Biological Sciences Division, University of Chicago, Chicago, Illinois, USA

<sup>6</sup>Computation Institute, University of Chicago, Chicago, Illinois, USA

<sup>7</sup>Department of Radiology, University of Chicago, Chicago, Illinois, USA

<sup>8</sup>Department of Pathology, University of Chicago, Chicago, Illinois, USA

<sup>9</sup>Section of Cardiac and Thoracic Surgery, Department of Surgery, University of Chicago, Chicago, Illinois, USA

## Correspondence to

Ravi Salgia, University of Chicago Medical Center, 5841 S. Maryland Avenue, MC2115, Chicago, IL 60637-1470; Email: [rsalgia@medicine.bsd.uchicago.edu](mailto:rsalgia@medicine.bsd.uchicago.edu); Phone: 773-702-6613; Fax: 773-702-3002

## Abstract

**Objective** An area of need in cancer informatics is the ability to store images in a comprehensive database as part of translational cancer research. To meet this need, we have implemented a novel tandem database infrastructure that facilitates image storage and utilization.

**Background** We had previously implemented the Thoracic Oncology Program Database Project (TOPDP) database for our translational cancer research needs. While useful for many research endeavors, it is unable to store images, hence our need to implement an imaging database which could communicate easily with the TOPDP database.

**Methods** The Thoracic Oncology Research Program (TORP) imaging database was designed using the Research Electronic Data Capture (REDCap) platform, which was developed by Vanderbilt University. To demonstrate proof of principle, we performed an investigation into tumor response for malignant pleural mesothelioma (MPM) patients treated with either of two analogous chemotherapy regimens.

**Results** A cohort of 22 MPM patients was identified using clinical data in the TOPDP database. After measurements were acquired, images were successfully stored in the TORP database, along with clinical and demographic data.

**Discussion** We implemented the TORP imaging database to be used in conjunction with our comprehensive TOPDP database. While it requires additional effort to use two databases, our database infrastructure facilitates more comprehensive translational research.

**Conclusion** The investigation described herein demonstrates the successful implementation and ease of use of this novel tandem imaging database infrastructure, as well as the potential utility of investigations enabled by it.

## Introduction

Imaging is an integral tool in oncology, aiding clinicians in such tasks as diagnosing a patient's malignancy, determining appropriate therapies, and assessing treatment response. In order to maximize the utility of cancer imaging, the oncology and imaging communities have devoted significant resources to developing informatics tools that allow both clinicians and researchers to store, utilize, and share cancer images in more effective ways.[1-3] Efforts to date have yielded many benefits, especially for clinicians and imaging specialists; however, they have yet to address some areas of need in cancer imaging. One of these deficit areas is the ability to efficiently store and utilize images as a part of collaborative translational cancer research.

The Thoracic Oncology Research Program at the University of Chicago Medical Center (UCMC) have used the Thoracic Oncology Program Database Project (TOPDP) database for our translational research efforts.[4] The TOPDP database was developed to serve as a comprehensive translational database that interfaces with the UCMC online tissue bank and integrates patient clinical information with proteomic and genomic information obtained from tumor tissue samples. Because the TOPDP database uses Microsoft Access as its underlying technology, it is technically capable of storing images. However, Access databases can only store up to 2 GB of data, so the TOPDP database does not meet our imaging storage demands. To meet this need, we have designed and implemented the Thoracic Oncology Research Program (TORP) imaging database using the Research Electronic Data Capture (REDCap) database platform, which was developed by researchers at Vanderbilt University and made available to UCMC by the University of Chicago Center for Research Informatics (CRI). Our TORP imaging database is not meant to replace our TOPDP database; rather, it is meant to be utilized in conjunction with the TOPDP database.

In the following paper, we demonstrate the potential of utilizing the TORP imaging database alongside our TOPDP relational database. To do this, we show proof of principle using a retrospective study investigating malignant pleural mesothelioma (MPM) patient tumor measurements in patients treated with either of two analogous chemotherapy regimens (carboplatin with pemetrexed and cisplatin with pemetrexed). While this paper will exclusively discuss MPM, it is our hope that this paper will be of general interest to oncology-related informatics as a whole, as it highlights the types of investigations made possible by our tandem informatics infrastructure.

### Background: Malignant Pleural Mesothelioma

Malignant pleural mesothelioma (MPM) is a deadly disease that affects nearly 3000 new patients annually in the United States.[5] In at least 70% of cases, the disease develops secondary to asbestos exposure, with a median latency period of 20 to 40 years.[5] MPM is an extremely difficult disease to treat, and median overall survival (OS) ranges between 6 and 17 months, depending on histologic subtype.[6] Currently, the standard chemotherapy agents for MPM are the antifolates, pemetrexed and raltitrexed.[7] While pemetrexed was shown to induce moderate response (14.1%) as a single agent, it demonstrated considerably higher activity (41.3% response) when used in conjunction with cisplatin.[8, 9] Cisplatin is sometimes poorly tolerated, especially in older patients, but it can be substituted with

1  
2  
3 carboplatin, a cisplatin analog which has a reduced toxicity profile.[7] Similar activity has been observed  
4 between cisplatin-pemetrexed and carboplatin-pemetrexed (26.3% response vs. 21.7%,  
5 respectively).[10] Imaging is critical in MPM cases because it is the primary means of assessing tumor  
6 response to treatment, which often correlates to such variables as patient quality of life and overall  
7 survival. Currently, computed tomography (CT) is the standard imaging modality used to assess tumor  
8 response; it can be supplemented with fluorodeoxyglucose-positron emission tomography (FDG-PET) or  
9 PET/CT, as well as magnetic resonance (MR) imaging.[11]

## 14 **Materials and Methods**

### 17 **Subject Enrollment**

18 Subjects were included in this retrospective study if they met the following criteria: 1) they were  
19 diagnosed with MPM, 2) were subsequently treated at UCMC with two or more cycles of either  
20 carboplatin-pemetrexed or cisplatin-pemetrexed, and 3) had a baseline CT scan acquired before their  
21 first chemotherapy cycle and a follow-up scan acquired after their second cycle. Providers decided  
22 which regimen patients should receive. All subjects were over 18 years of age. No healthy controls were  
23 included in this study.

### 27 **Human Subject Protection**

28 All subjects signed a written consent for one of two UCMC Institutional Review Board (IRB) protocols.  
29 One is a prospective tissue-banking study that allows researchers to bank and analyze tissue from  
30 patients treated at UCMC for a thoracic malignancy. The other allows for the study of tissue which has  
31 already been collected. Although no tumor tissue analysis was performed for the present study, both  
32 protocols also allow for the abstraction of medical information and images from the patients' charts.

### 36 **Database Security Measures**

37 Both the TOPDP and TORP databases include the protective measures necessary to ensure that they  
38 meet or exceed regulatory requirements instituted by the Health Insurance Portability and  
39 Accountability Act (HIPAA) Security Rule and HIPAA Privacy Rule.[12, 13] Microsoft Access databases do  
40 not automatically have these protective measures in place, but the TOPDP database has been amended  
41 using optional Access security features and Visual Basic for Applications (VBA) scripts to meet HIPAA  
42 regulations for databases. In particular, access to the database is restricted to an approved list of users,  
43 username and passwords are required when opening the database, the database is encrypted, and an  
44 audit trail has been created to track changes and user access. Additionally, data can be automatically de-  
45 identified before export. REDCap has inherent security measures: only approved users are given access;  
46 different users are assigned different levels of access, depending on their research needs; username and  
47 password are required; an audit trail records the time, nature, and author of a change to the database;  
48 and fields marked as identifiers can automatically be excluded when data are exported. Lastly,  
49 embedded protected health information (PHI) within images was anonymized by the University of  
50 Chicago Human Imaging Research Office (HIRO).[14]

## Informatics Infrastructure

The TOPDP database contains demographic, clinical, follow-up, proteomic, and genomic data for over 3000 patients with various thoracic malignancies. It is a relational database which is composed of a master Patients Table and subsidiary tables which are linked to the Patients Table via a common field, in this case, a field containing the patient's medical record number (MRN). Currently, most subsidiary tables contain genomic and proteomic data, but new tables can be designed as needed. Related tables can be queried to display desired variables in a new table.

For every patient, the Patients Table contains demographic and clinical data, as well as data regarding social, environmental, and family history. These variables follow the national standard for oncology databases, as set forth by the NCI Common Data Elements Committee, but they extend beyond standard variables to meet needs specific to the Thoracic Oncology Program.[15] Not all variables of interest are contained in the patients' medical charts; consequently, it is necessary to obtain data via a patient interview; following the patient interview, unknown or unreported variables are abstracted from the patient's medical chart, which is also used to crosscheck patient-reported data for quality assurance purposes. Data are subsequently imported into the TOPDP database.

The TOPDP database is used not only to give a comprehensive view of all consented patients and related research performed by the lab but also to identify smaller cohorts of patients for new research projects in the context of the currently-existing IRB protocol, as was done in this study and as will be described in further detail below. The Patients Table is designed to give general knowledge of each patient's demographics, history, and oncology care; it is not meant to be an exhaustive record. For example, the database captures whether or not a patient has received chemotherapy and the names of the chemotherapy agents the patient has received. However, it does not capture information regarding the number or timing of chemotherapy cycles. Such detailed information is time-consuming to collect and is generally of little utility for our research. When more detailed patient information is required for an investigation, it is abstracted from the patient's medical chart and imported into the TOPDP database in a subsidiary table.

In most cases, the TOPDP database also stores the data required for hypothesis validation after the data are generated or collected. However, in some instances, the TOPDP database is insufficient, as when large files must be stored as part of the study. In this case, the TORP database is used alongside the TOPDP database. Identical tables are created in both databases, data in the TOPDP database are transferred into the TORP database, and the TORP database is augmented with uploaded files (e.g., images). Figure 1 presents a chart detailing our informatics infrastructure.

## Utilization of Databases for MPM Study

For the purposes of this study, the TOPDP database was used to identify a cohort of previously-consented qualifying MPM patients. Specifically, the Patients Table was filtered to display patients with MPM who had received chemotherapy and who had CT scans acquired at UCMC. However, additional data (number and dates of CT scans and chemotherapy cycles) were required to verify that patients met the selection criteria. These data were abstracted from the patients' medical charts and then entered into a subsidiary table created in the TOPDP database to capture desired variables. A similar table was

1  
2  
3 then created in the TORP imaging database. Both tables were identical, with the exception that the  
4 TORP database table also contained file upload fields, which were used to capture pre- and post-  
5 treatment CT section images and histological images. To ensure that data were transferred correctly and  
6 easily, fields were given the same names in both databases. Data were transferred from the TOPDP  
7 database to the TORP database using a Microsoft Excel comma-separated values (.csv) spreadsheet as  
8 an intermediary. Images were uploaded into the TORP database using REDCap's online file uploader.  
9 Data were exported to Microsoft Excel for analysis.

### 13 Data Elements and Imaging

14 For each patient, demographic, exposure (to known MPM risk factors), and clinical data relevant to  
15 MPM were captured. Many of these data (e.g. histology, stage, grade, treatments received, imaging  
16 acquired, vital status, Eastern Cooperative Oncology Group (ECOG) performance status at time of first  
17 visit, etc.) are routinely captured for all patients entered into the database. However, some variables of  
18 interest are not routinely collected (for example, number, date(s), and type(s) of surgeries and  
19 chemotherapy cycles; number and date(s) of CT scans; response to treatment), as they are not  
20 necessary for most of the investigations performed by the lab. These variables were collected for  
21 subjects included in this study via chart abstraction after an initial cohort of subjects was identified.

22  
23 In addition, as histology is integral for prognosis in MPM,[6] histological images were selected and  
24 supplied to the research team by the UCMC pathology department. Three types of images were  
25 selected: low power images, medium power images, and images with immunohistochemistry (IHC)  
26 staining. Patients had between 0 and 35 IHC images. Example pathological images can be found in figure  
27 2. Finally, two CT images for each patient were obtained and uploaded into the database: a  
28 representative section image from a baseline pre-treatment CT scan and an anatomically matched  
29 section image from a follow-up CT scan acquired according to clinical protocol. Follow-up images were  
30 selected from scans acquired immediately after the second cycle of treatment. If no scan was acquired  
31 immediately after cycle two, the next available scan after the second cycle of treatment was selected.  
32 While the Modified Response Evaluation Criteria in Solid Tumors (RECIST) dictates that tumor thickness  
33 be measured at two pleural lesions on three different slices at least 1 cm apart,[16] it was felt that since  
34 this study was performed as a demonstration, only one pre- and one post-treatment measurement were  
35 necessary to show proof of principle. Sample pre- and post-therapy CT section images are presented in  
36 figure 3.

37  
38 Scans used for research purposes were obtained by UCMC's Human Imaging Research Office (HIRO)  
39 from the Department of Radiology's clinical image archive. After images were anonymized by the HIRO,  
40 a study investigator selected representative sections for pleural measurement. Measurement of pleural  
41 thickness was performed using a radiology software package called Abras, which was developed in-  
42 house. Abras is image-visualization interface software that offers tools for image annotation,  
43 measurement, and contouring and enables the extraction of a wide-range of image-based quantitative  
44 and statistical data. It provides users with a high degree of versatility in the interaction with, and  
45 manipulation of, medical images. Abras was developed to provide a cross-platform tool to rapidly  
46 access, view, and evaluate images in support of medical imaging research projects.



## Results

### Database Results

Using the TOPDP database, 129 consented patients with MPM were identified. 22 patients met the selection criteria. For these 22 patients, data were captured in the TOPDP database and subsequently transferred to the TORP database. Patient pre- and post-treatment CT scans were assessed, tumor measurements were recorded, and representative images were stored in the TORP database. Lastly, histological images were also captured for future research use.

Specific results from the study itself are detailed below. It is important to emphasize that tumor measurements were not acquired in accordance with Modified RECIST[16] and were only acquired at two time points. Consequently, these tumor measurements cannot be considered valid data from which to draw clinical conclusions. They are included here, nevertheless, as an example of the kind of results enabled by utilizing this informatics infrastructure.

### Example Results Enabled by Utilization of the TOPDP and TORP Databases to Assess Tumor Response

#### Patient Characteristics

Patient characteristics are listed in Table 1. Of the 22 patients, 21 were male and 1 was female. 20 were Caucasian and 2 were African American. Ages ranged from 47 to 80 years, with a median age of 65 years. 18 patients endorsed prior occupational and/or para-occupational asbestos exposure; 2 patients reported unknown exposure; and 2 patients did not have data regarding asbestos exposure recorded in the TOPDP database or their electronic medical records (EMRs). 16 patients were diagnosed with epithelial mesothelioma, 2 with sarcomatoid mesothelioma, and 2 with mixed-type mesothelioma. 18 patients underwent one or more surgeries: 3 patients underwent extrapleural pneumonectomy, three underwent pleurodesis, 6 underwent pleurectomy/decortication, and a further 6 underwent pleurodesis followed by pleurectomy/decortication. 11 patients were assessed by the clinician as having an ECOG performance status of 0 at their initial appointments, 8 received a score of 1, and 3 patients were given a score of 2.

#### Chemotherapy Response

Table 2 summarizes chemotherapy details and patient outcome by chemotherapy regimen. Table 3 provides more detailed data regarding pleural measurements for each patient. 14 patients received two to four cycles of carboplatin-pemetrexed and 8 patients received four to six cycles of cisplatin-pemetrexed. Overall, 1 patient received two cycles, 5 patients received three cycles, 11 patients received four cycles, 2 patients received five cycles, and 3 patients received six cycles of chemotherapy. Based on the measurements generated for this study, the mean percentage change in pleural thickness for carboplatin-pemetrexed patients was -25%, indicating a 25% reduction in pleural thickness between the time points of the two CT scans, compared to -11% for cisplatin-pemetrexed patients. Of the 14 patients who received carboplatin-pemetrexed, 9 (41%) remain alive 6-28 months after commencing chemotherapy. Of the 8 patients who received cisplatin-pemetrexed, 4 (50%) remain alive at 16-27 months after commencing chemotherapy.



## Discussion

Informatics has been an important part of cancer research efforts to develop more effective diagnostics and therapeutics. These initiatives have led to better clinical outcomes for many patients.[17, 18] However, prognosis for many patients, including those with MPM, remains poor.[17, 18] Consequently, it is imperative that we continue researching novel therapeutics to combat cancer as its incidence rises worldwide. To ensure that such research continues, we must develop informatics infrastructures that meet research needs.

Unfortunately, widely-available, readymade database platforms are often designed to meet a variety of research needs, but rarely ever do they meet all the needs of a specific researcher. Consequently, it is sometimes necessary, as in this case, to utilize tandem databases in order to undertake certain research projects. Microsoft Access has been a very useful platform for our translational research due to its relational nature, ease of querying, portability, ease of deployment, and low cost and ubiquity, which enable collaboration with institutions around the world. These features have allowed us to develop the TOPDP database, a comprehensive thoracic database containing patient demographic, clinical, proteomic, and genomic data in a centralized location.[4] However, Microsoft Access is not without its problems: in particular, Access databases are limited to a 2 GB footprint. Thus, Access is well-suited to capture text-based data, but it is limited when capturing images or other files with a large memory footprint.

For this reason, we developed the TORP database using the online REDCap database platform, which was developed at Vanderbilt University and made available to us by the University of Chicago CRI. Like Microsoft Access, the REDCap platform is well-suited to meet some of our research needs, but falls short in other areas. REDCap is not relational, so the decision was made to maintain our comprehensive database in Microsoft Access. However, REDCap allows up to 1 TB of storage space and so is ideal for research projects utilizing large files. This capability was especially important for this research project, as multiple representative images from CT scans and histological images for each patient were uploaded into the database. Moreover, REDCap interacts easily with Access, communicating via Microsoft Excel or an API call, and, like Access, REDCap encourages collaboration within and among institutions, as it is web-based and available freely.

In addition to facilitating more robust and novel analyses, this database structure also fosters intra- and inter-institutional collaboration. Microsoft Access is widely available for a minimal cost, and REDCap is available freely online to registered users. Moreover, researchers interested in adopting the Salgia Lab's TOPDP and TORP databases may access the lab's standard operating procedures (SOPs) for its Access[19] and REDCap[20] databases, which further detail the construction and utilization of the databases and are freely available on the iBridge network. Only by developing a common infrastructure will we be able to facilitate fast and easy collaboration in MPM research, which will be essential if the global biomedical research community is to overtake this increasingly global disease.

## Limitations

### Study Limitations

While the TOPDP database has information on over 3000 patients, the study was limited by sample size. Only 22 patients met the inclusion criteria requiring that patients were diagnosed with MPM, treated with at least two cycles of carboplatin-pemetrexed or cisplatin-pemetrexed, and had CT scans acquired prior to and following two cycles of chemotherapy treatment. As this study was retrospective, it was also limited by a lack of standardization: when possible, we selected a follow-up CT scan acquired immediately after the second cycle of chemotherapy, but for some patients, follow-up CT scans were only available after the third or fourth cycle. Additionally, patients received different numbers of chemotherapy cycles. Furthermore, due to the study's retrospective nature, some patient data remained unreported because it could not be found in physician notes during chart abstraction. Finally, tumor measurements were not acquired using Modified RECIST, so they cannot be said to be valid data from which we can draw clinical conclusions.

### Informatics Limitations

Data were transferred easily from the Access to REDCap databases using Microsoft Excel as an intermediary and REDCap's data upload functionality. This method was sufficient for the purposes of the present study, but if necessary or desired, it is also possible to automate the data transfer process using the REDCap API. One limitation of the current informatics infrastructure is that data must be captured via either patient report or chart abstraction and then manually entered into the TOPDP database. This process is tedious, subject to error, and time-consuming. However, there are plans to automate this process by enabling data to be transferred immediately from the patient's EMR, which will reduce workload and the potential for error considerably.

## Conclusion

Informatics must continue to enable more robust cancer research by meeting evolving research needs. One of these needs has been the ability to utilize and store imaging as a part of translational cancer research. To fill this deficit area, we have implemented a novel tandem database using our TOPDP and TORP databases. As proof of principle, we utilized these databases to investigate MPM tumor response to two standard chemotherapy regimens. While our focus has been thoracic malignancies, it is our hope that this example investigation has illustrated the potential of our informatics infrastructure for use in cancer research as a whole.

## Tables and Figures

**Table 1 Patient Characteristics**

|                                 | Number of<br>Cases (%) |
|---------------------------------|------------------------|
| <b>Total Cases</b>              | 22 (100)               |
| <b>Sex</b>                      |                        |
| Male                            | 21 (95)                |
| Female                          | 1 (5)                  |
| <b>Race</b>                     |                        |
| Caucasian                       | 17 (77)                |
| African American                | 2 (9)                  |
| Other                           | 0 (0)                  |
| Unspecified                     | 3 (14)                 |
| <b>Histology</b>                |                        |
| Mesothelioma– Sarcomatoid Type  | 2 (9)                  |
| Mesothelioma– Epithelioid Type  | 16 (73)                |
| Mesothelioma– Mixed Type        | 4 (18)                 |
| <b>Surgery*</b>                 |                        |
| Extrapleural Pneumonectomy      | 3 (14)                 |
| Pleurectomy/Decortication       | 12 (55)                |
| Pleurodesis                     | 9 (41)                 |
| <b>Asbestos Exposure</b>        |                        |
| Occupational/Para-Occupational  | 18 (82)                |
| Unknown                         | 2 (9)                  |
| Not Reported                    | 2 (9)                  |
| <b>Age at Diagnosis (years)</b> |                        |
| Median                          | 65                     |
| Range                           | 47-80                  |

\*Some patient underwent more than one procedure.

Table 2 Chemotherapy Details

|                                            | Number of Cases (%)* |                        |                      |
|--------------------------------------------|----------------------|------------------------|----------------------|
|                                            | Entire Patient Pool  | Carboplatin-pemetrexed | Cisplatin-pemetrexed |
| <b>Total Patients</b>                      | 22                   | 14 (64)                | 8 (36)               |
| <b>Cycles of Chemotherapy</b>              |                      |                        |                      |
| 2                                          | 1 (5)                | 1 (7)                  | 0 (0)                |
| 3                                          | 5 (23)               | 5 (36)                 | 0 (0)                |
| 4                                          | 11 (50)              | 8 (57)                 | 3 (38)               |
| 5                                          | 2 (9)                | 0 (0)                  | 2 (25)               |
| 6                                          | 3 (14)               | 0 (0)                  | 3 (38)               |
| <b>Pleural Thickness Percentage Change</b> |                      |                        |                      |
| Mean                                       | -20%                 | -25%                   | -11%                 |
| Median                                     | -19%                 | -18%                   | -19%                 |
| <b>Performance Status</b>                  |                      |                        |                      |
| 0                                          | 11 (50)              | 9 (41)                 | 2 (9)                |
| 1                                          | 8 (36)               | 3 (14)                 | 5 (23)               |
| 2                                          | 3 (14)               | 2 (9)                  | 1(5)                 |
| <b>Vital Status at Time of Study</b>       |                      |                        |                      |
| Alive                                      | 13 (59)              | 9 (64)                 | 4 (50)               |
| Deceased                                   | 9 (41)               | 5 (36)                 | 4(50)                |

\*Due to rounding, percentages may not sum to 100.

Table 3 Chemotherapy response details

| Patient ID | Chemo-therapy Regimen* | Chemo-therapy Total Cycles | Follow-Up CT Scan Post-Cycle | Pleural Thickness Pre-Cycle 1 (mm) | Pleural Thickness Follow-Up CT Scan (mm) | Difference in Pleural Thickness (mm) |
|------------|------------------------|----------------------------|------------------------------|------------------------------------|------------------------------------------|--------------------------------------|
| 1          | Cis/Pem                | 4                          | 4                            | 6.96                               | 4.39                                     | -2.57                                |
| 2          | Cis/Pem                | 4                          | 2                            | 19.67                              | 17.06                                    | -2.61                                |
| 3          | Cis/Pem                | 6                          | 2                            | 10.83                              | 8.61                                     | -2.22                                |
| 4          | Cis/Pem                | 4                          | 2                            | 34.53                              | 28.29                                    | -6.24                                |
| 5          | Cis/Pem                | 5                          | 2                            | 16.06                              | 12.75                                    | -3.31                                |
| 6          | Cis/Pem                | 6                          | 2                            | 25.28                              | 17.01                                    | -8.27                                |
| 7          | Cis/Pem                | 5                          | 2                            | 24.00                              | 33.47                                    | 9.47                                 |
| 8          | Cis/Pem                | 6                          | 2                            | 10.50                              | 12.10                                    | 1.60                                 |
| 9          | Carbo/Pem              | 4                          | 2                            | 16.75                              | 14.21                                    | -2.54                                |
| 10         | Carbo/Pem              | 4                          | 2                            | 18.94                              | 12.52                                    | -6.42                                |
| 11         | Carbo/Pem              | 3                          | 2                            | 13.30                              | 9.19                                     | -4.11                                |
| 12         | Carbo/Pem              | 3                          | 3                            | 41.82                              | 44.29                                    | 2.47                                 |
| 13         | Carbo/Pem              | 4                          | 4                            | 13.44                              | 7.16                                     | -6.28                                |
| 14         | Carbo/Pem              | 4                          | 3                            | 41.04                              | 30.94                                    | -10.10                               |
| 15         | Carbo/Pem              | 2                          | 2                            | 48.65                              | 9.47                                     | -39.18                               |
| 16         | Carbo/Pem              | 4                          | 4                            | 5.59                               | 5.12                                     | -0.47                                |
| 17         | Carbo/Pem              | 4                          | 2                            | 21.89                              | 19.68                                    | -2.21                                |
| 18         | Carbo/Pem              | 4                          | 4                            | 28.59                              | 22.70                                    | -5.89                                |
| 19         | Carbo/Pem              | 3                          | 3                            | 23.61                              | 21.87                                    | -1.74                                |
| 20         | Carbo/Pem              | 3                          | 3                            | 13.46                              | 12.12                                    | -1.34                                |
| 21         | Carbo/Pem              | 3                          | 3                            | 20.35                              | 19.30                                    | -1.05                                |
| 22         | Carbo/Pem              | 4                          | 4                            | 6.30                               | 2.65                                     | -3.65                                |
| Average    | Cis/Pem                | 5                          | 2.25                         | 18.48                              | 16.71                                    | -1.77                                |
| Average    | Carbo/Pem              | 3.5                        | 2.93                         | 22.41                              | 16.52                                    | -5.89                                |

\*Abbreviations: Carbo, carboplatin; Cis, cisplatin; Pem, pemetrexed

1  
2  
3  
4  
5  
6  
7  
8  
9  
10  
11  
12  
13  
14  
15  
16  
17  
18  
19  
20  
21  
22  
23  
24  
25  
26  
27  
28  
29  
30  
31  
32  
33  
34  
35  
36  
37  
38  
39  
40  
41  
42  
43  
44  
45  
46  
47  
48  
49  
50  
51  
52  
53  
54  
55  
56  
57  
58  
59  
60

Figure 1. Mind map illustrating the relationships between the databases utilized for this project.

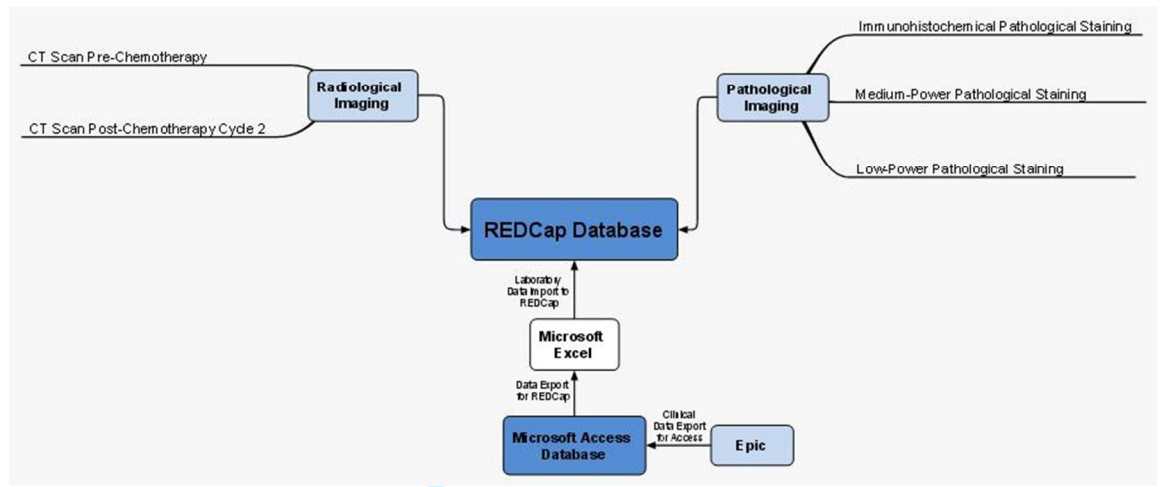

peer review only

1  
2  
3 **Figure 2. Representative histological images.**  
4

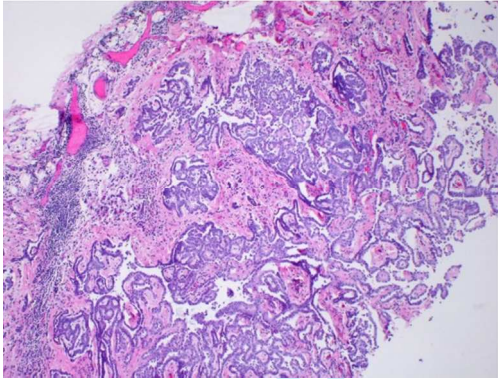

18  
19 **2a. Low power photomicrograph of pleural biopsy showing malignant mesothelioma, epithelioid type,**  
20 **tubulo-papillary pattern**  
21

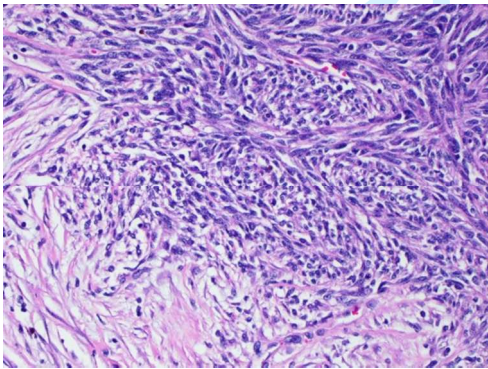

34  
35 **2b. Medium power photomicrograph of pleural resection showing malignant mesothelioma, sarcomatoid**  
36 **type**  
37

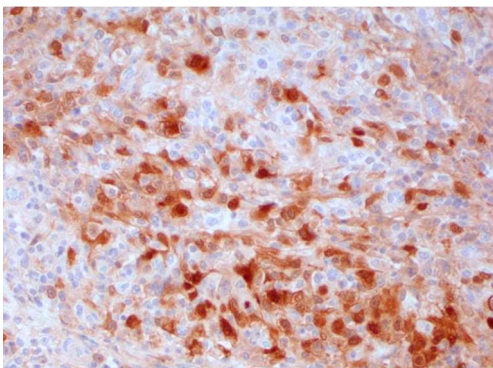

50  
51 **2c. Medium power photomicrograph of malignant mesothelioma, epithelioid type, staining positive for**  
52 **calretinin (both nuclear and cytoplasmic staining)**  
53  
54  
55  
56  
57  
58  
59  
60



1  
2  
3  
4  
5  
6  
7  
8  
9  
10  
11  
12  
13  
14  
15  
16  
17  
18  
19  
20  
21  
22  
23  
24  
25  
26  
27  
28  
29  
30  
31  
32  
33  
34  
35  
36  
37  
38  
39  
40  
41  
42  
43  
44  
45  
46  
47  
48  
49  
50  
51  
52  
53  
54  
55  
56  
57  
58  
59  
60

**Figure 3** Example of measurement of CT scan images from a single patient. (A) CT scan image pre-cycle 1 of chemotherapy. Pleural thickness pre-treatment was 13.3 mm. (B) CT scan image post-cycle 2 of chemotherapy. Pleural thickness post-2 cycles of treatment was 9.19 mm.

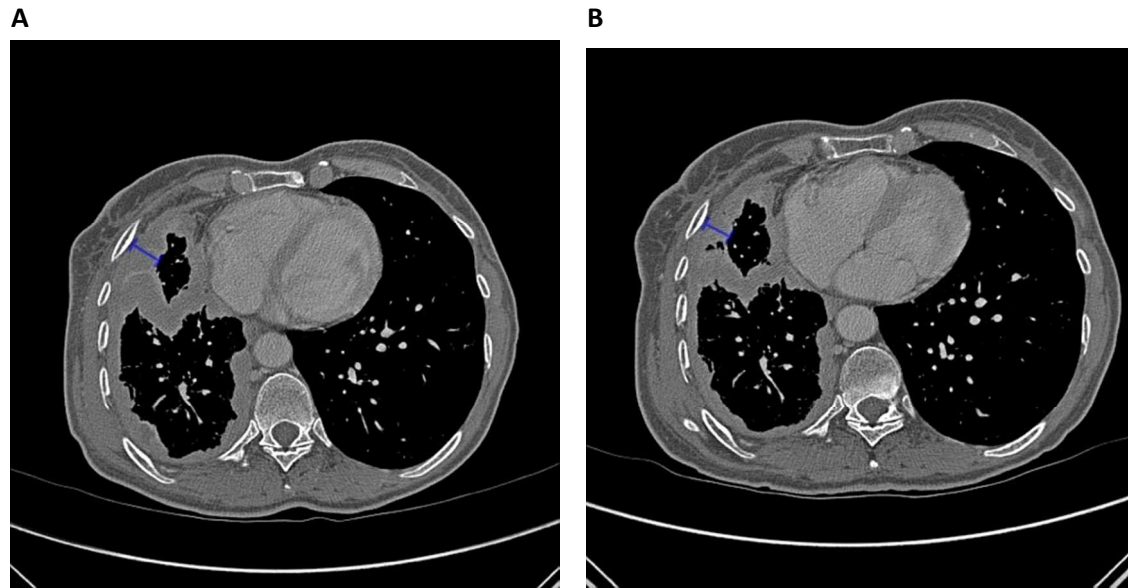

For peer review only

## Acknowledgements

The REDCap project at the University of Chicago is hosted and managed by the Center for Research Informatics and funded by the Biological Sciences Division and by the Institute for Translational Medicine, CTSA grant number UL1 RR024999 from the National Institutes of Health. Also, this work was supported in part by 5R01CA100750-08, 5R01CA125541-05, and 5R01CA129501-04 (RS). EV is supported by ASCO Translational Professorship.

## References

1. Armato SG, 3rd, McLennan G, McNitt-Gray MF, et al. Lung image database consortium: developing a resource for the medical imaging research community. *Radiology* 2004;**232**:739-48.
2. Armato SG, 3rd, Ogarek JL, Starkey A, et al. Variability in mesothelioma tumor response classification. *AJR Am J Roentgenol* 2006;**186**:1000-6.
3. Lloyd S, Jirotko M, Simpson AC, et al. Digital mammography: A world without film?. *Methods Inf Med* 2005;**44**:168-71.
4. Surati M, Robinson M, Nandi S, et al. Proteomic characterization of non-small cell lung cancer in a comprehensive translational thoracic oncology database. *J Clin Bioinforma* 2011;**1**:1-11.
5. Teta MJ, Mink PJ, Lau E, et al. US mesothelioma patterns 1973-2002: indicators of change and insights into background rates. *Eur J Cancer Prev* 2008;**17**:525-34.
6. Rusch VW, Giroux D, Edwards J, et al. Initial analyses of the IASLC International Database for Malignant Pleural Mesothelioma (MPM) [abstract]. *Proc IASLC* 2009;**4**.
7. Campbell NP, Kindler HL. Update on Malignant Pleural Mesothelioma. *Semin Respir Crit Care Med* 2011;**32**:102-10.
8. Scagliotti GV, Shin DM, Kindler HL, et al. Phase II study of pemetrexed with and without folic acid and vitamin B12 as front-line therapy in malignant pleural mesothelioma. *J Clin Oncol* 2003;**21**:1556-61.
9. Vogelzang NJ, Rusthoven JJ, Symanowski J, et al. Phase III study of pemetrexed in combination with cisplatin versus cisplatin alone in patients with malignant pleural mesothelioma. *J Clin Oncol* 2003;**21**:2636-44.
10. Santoro A, O'Brien ME, Stahel RA, et al. Pemetrexed plus cisplatin or pemetrexed plus carboplatin for chemo-naïve patients with malignant pleural mesothelioma: results of the International Expanded Access Program. *J Thorac Oncol* 2008;**3**:756-63.
11. Wang ZJ, Reddy GP, Gotway MB, et al. Malignant pleural mesothelioma: evaluation with CT, MR imaging, and PET. *Radiographics* 2004;**24**:105-19.
12. Office of Civil Rights, U.S. Dept. of Health and Human Services. Health Insurance Reform: Security Standards: Final Rule. *Fed Regist* 2003;**68**:8334-81.
13. Office of Civil Rights, U.S. Dept. of Health and Human Services. Standards for privacy of individually identifiable health information: Final Rule. *Fed Regist* 2000;**65**:82462-829.
14. Armato SG, 3rd, Grusauskas N, MacMahon H, et al. The Human Imaging Research Office (HIRO): Advancing the role of imaging in clinical trials [abstract]. *Medical Physics* 2011;**38**:3406.
15. Patel AA, Kajdacsy-Balla A, Berman JJ, et al. The development of common data elements for a multi-institute prostate cancer tissue bank: the Cooperative Prostate Cancer Tissue Resource (CPCTR) experience. *BMC Cancer* 2005;**5**:108.

- 1
- 2
- 3
- 4
- 5 16. Byrne MJ, Nowak AK. Modified RECIST criteria for assessment of response in malignant pleural
- 6 mesothelioma. *Ann Oncol* 2004;**15**:257-60.
- 7 17. Jemal A, Bray F, Center MM, et al. Global cancer statistics. *CA Cancer J Clin* 2011;**61**:69-90.
- 8 18. Siegel R, Ward E, Brawley O, et al. Cancer statistics, 2011: the impact of eliminating
- 9 socioeconomic and racial disparities on premature cancer deaths. *CA Cancer J Clin* 2011;**61**:212-
- 10 36.
- 11 19. Thoracic Oncology Research Program Microsoft Access Template. [cited 2011 12/01/2011];
- 12 Available from: [http://www.ibridgenetwork.org/uctech/salgia-thoracic-oncology-access-](http://www.ibridgenetwork.org/uctech/salgia-thoracic-oncology-access-template)
- 13 [template](http://www.ibridgenetwork.org/uctech/salgia-thoracic-oncology-access-template).
- 14 20. Thoracic Oncology Program Database Project REDCap Standard Operating Procedure. [cited
- 15 2011 12/01/2011]; Available from: [http://www.ibridgenetwork.org/uctech/salgia-thoracic-](http://www.ibridgenetwork.org/uctech/salgia-thoracic-oncology-redcap-database-sop)
- 16 [oncology-redcap-database-sop](http://www.ibridgenetwork.org/uctech/salgia-thoracic-oncology-redcap-database-sop).
- 17
- 18
- 19
- 20
- 21
- 22
- 23
- 24
- 25
- 26
- 27
- 28
- 29
- 30
- 31
- 32
- 33
- 34
- 35
- 36
- 37
- 38
- 39
- 40
- 41
- 42
- 43
- 44
- 45
- 46
- 47
- 48
- 49
- 50
- 51
- 52
- 53
- 54
- 55
- 56
- 57
- 58
- 59
- 60

Figure 1. Mind map illustrating the relationships between the databases utilized for this project.

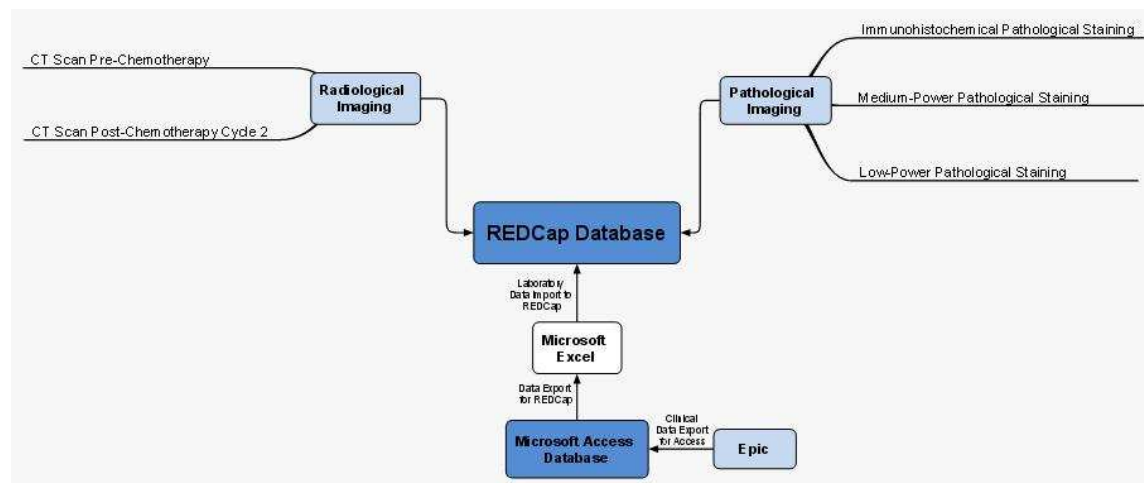

peer review only

1  
2  
3  
4  
5  
6  
7  
8  
9  
10  
11  
12  
13  
14  
15  
16  
17  
18  
19  
20  
21  
22  
23  
24  
25  
26  
27  
28  
29  
30  
31  
32  
33  
34  
35  
36  
37  
38  
39  
40  
41  
42  
43  
44  
45  
46  
47  
48  
49  
50  
51  
52  
53  
54  
55  
56  
57  
58  
59  
60

1  
2  
3  
4  
5  
6  
7  
8  
9  
10  
11  
12  
13  
14  
15  
16  
17  
18  
19  
20  
21  
22  
23  
24  
25  
26  
27  
28  
29  
30  
31  
32  
33  
34  
35  
36  
37  
38  
39  
40  
41  
42  
43  
44  
45  
46  
47  
48  
49  
50  
51  
52  
53  
54  
55  
56  
57  
58  
59  
60

**Figure 2. Representative histological images.**

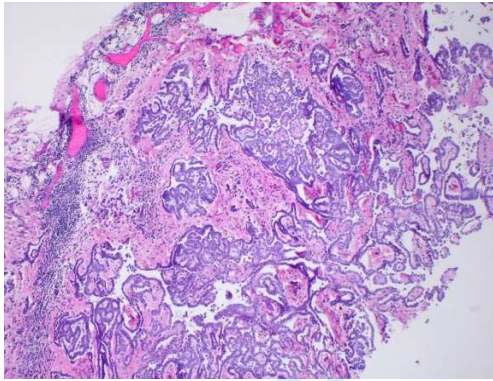

2a. Low power photomicrograph of pleural biopsy showing malignant mesothelioma, epithelioid type, tubulo-papillary pattern

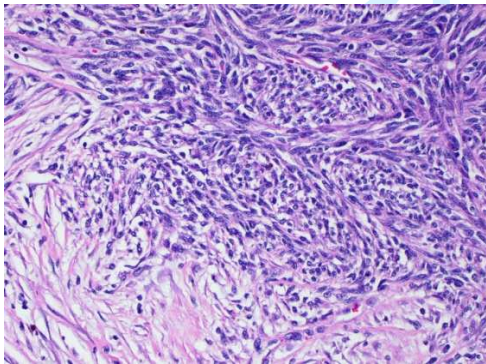

2b. Medium power photomicrograph of pleural resection showing malignant mesothelioma, sarcomatoid type

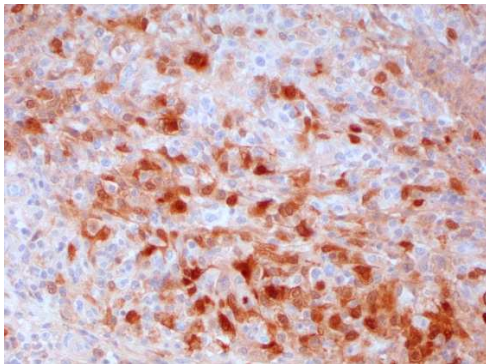

2c. Medium power photomicrograph of malignant mesothelioma, epithelioid type, staining positive for calretinin (both nuclear and cytoplasmic staining)

1  
2  
3  
4  
5  
6  
7  
8  
9  
10  
11  
12  
13  
14  
15  
16  
17  
18  
19  
20  
21  
22  
23  
24  
25  
26  
27  
28  
29  
30  
31  
32  
33  
34  
35  
36  
37  
38  
39  
40  
41  
42  
43  
44  
45  
46  
47  
48  
49  
50  
51  
52  
53  
54  
55  
56  
57  
58  
59  
60

**Figure 3** Example of measurement of CT scan images from a single patient. (A) CT scan image pre-cycle 1 of chemotherapy. Pleural thickness pre-treatment was 13.3 mm. (B) CT scan image post-cycle 2 of chemotherapy. Pleural thickness post-2 cycles of treatment was 9.19 mm.

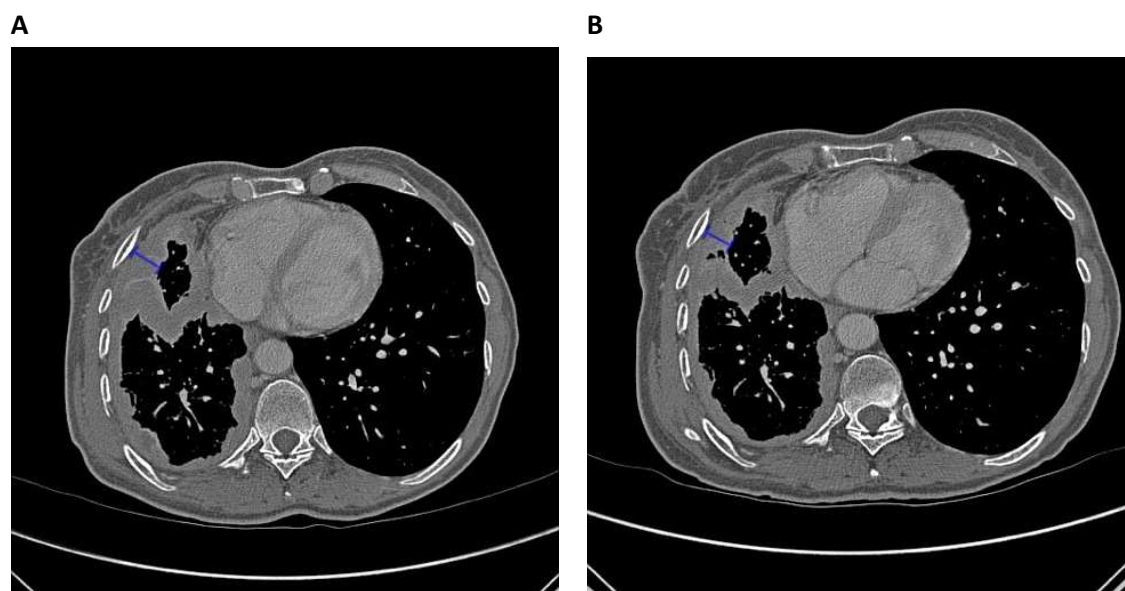



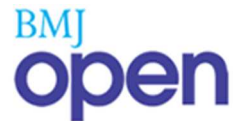

**Utilization of a Thoracic Oncology Database to Capture  
Radiological and Pathological Images for Evaluation of  
Response to Chemotherapy in Patients with Malignant  
Pleural Mesothelioma**



|                                 |                                                                                                                                                                                                                                                                                                                                                                                                                                                                                                                                                                                                                                                                                                                                                                                                                                                                                                                                                                                                                                                                                |
|---------------------------------|--------------------------------------------------------------------------------------------------------------------------------------------------------------------------------------------------------------------------------------------------------------------------------------------------------------------------------------------------------------------------------------------------------------------------------------------------------------------------------------------------------------------------------------------------------------------------------------------------------------------------------------------------------------------------------------------------------------------------------------------------------------------------------------------------------------------------------------------------------------------------------------------------------------------------------------------------------------------------------------------------------------------------------------------------------------------------------|
| Journal:                        | <i>BMJ Open</i>                                                                                                                                                                                                                                                                                                                                                                                                                                                                                                                                                                                                                                                                                                                                                                                                                                                                                                                                                                                                                                                                |
| Manuscript ID:                  | bmjopen-2012-001620.R1                                                                                                                                                                                                                                                                                                                                                                                                                                                                                                                                                                                                                                                                                                                                                                                                                                                                                                                                                                                                                                                         |
| Article Type:                   | Research                                                                                                                                                                                                                                                                                                                                                                                                                                                                                                                                                                                                                                                                                                                                                                                                                                                                                                                                                                                                                                                                       |
| Date Submitted by the Author:   | 20-Aug-2012                                                                                                                                                                                                                                                                                                                                                                                                                                                                                                                                                                                                                                                                                                                                                                                                                                                                                                                                                                                                                                                                    |
| Complete List of Authors:       | Carey, George; University of Chicago, Medicine<br>Kazantsev, Stephanie; University of Chicago, Pritzker School of Medicine<br>Surati, Mosmi; University of Michigan, Medicine<br>Rolle, Cleo; University of Chicago, Medicine<br>Kanteti, Archana; University of Illinois College of Medicine,<br>Sadiq, Ahad; University of Chicago, Medicine<br>Bahroos, Neil; University of Chicago, Center for Research Informatics<br>Raumann, Brigitte; University of Chicago, Center for Research Informatics<br>Madduri, Ravi; University of Chicago, Center for Research Informatics<br>Dave, Paul; University of Chicago, Center for Research Informatics<br>Starkey, Adam; University of Chicago, Radiology<br>Hensing, Thomas; University of Chicago, Medicine<br>Husain, Aliya; University of Chicago, Pathology<br>Vokes, Everett; University of Chicago, Medicine<br>Vigneswaran, Wickii; University of Chicago, Surgery<br>Armato, Samuel; University of Chicago, Radiology<br>Kindler, Hedy; University of Chicago, Medicine<br>Salgia, Ravi; University of Chicago, Medicine |
| <b>Primary Subject Heading</b>: | Oncology                                                                                                                                                                                                                                                                                                                                                                                                                                                                                                                                                                                                                                                                                                                                                                                                                                                                                                                                                                                                                                                                       |
| Secondary Subject Heading:      | Respiratory medicine, Radiology and imaging, Oncology, Health informatics                                                                                                                                                                                                                                                                                                                                                                                                                                                                                                                                                                                                                                                                                                                                                                                                                                                                                                                                                                                                      |
| Keywords:                       | BASIC SCIENCES, Adult oncology < ONCOLOGY, Information management < BIOTECHNOLOGY & BIOINFORMATICS                                                                                                                                                                                                                                                                                                                                                                                                                                                                                                                                                                                                                                                                                                                                                                                                                                                                                                                                                                             |
|                                 |                                                                                                                                                                                                                                                                                                                                                                                                                                                                                                                                                                                                                                                                                                                                                                                                                                                                                                                                                                                                                                                                                |

SCHOLARONE™  
Manuscripts



# Utilization of a Thoracic Oncology Database to Capture Radiological and Pathological Images for Evaluation of Response to Chemotherapy in Patients with Malignant Pleural Mesothelioma

---

George B. Carey<sup>1</sup>, Stephanie Kazantsev<sup>2</sup>, Mosmi Surati<sup>3</sup>, Cleo E. Rolle<sup>1</sup>, Archana Kanteti<sup>4</sup>, Ahad Sadiq<sup>1</sup>, Neil Bahroos<sup>5</sup>, Brigitte Raumann<sup>5</sup>, Ravi Madduri<sup>6</sup>, Paul Dave<sup>6</sup>, Adam Starkey<sup>7</sup>, Thomas Hensing<sup>1</sup>, Aliya N. Husain<sup>8</sup>, Everett E. Vokes<sup>1</sup>, Wickii Vigneswaran<sup>9</sup>, Samuel G. Armato, III<sup>7</sup>, Hedy L. Kindler<sup>1</sup>, Ravi Salgia<sup>1</sup>

<sup>1</sup>Section of Hematology/Oncology, Department of Medicine, University of Chicago, Chicago, Illinois, USA

<sup>2</sup>Pritzker School of Medicine, University of Chicago, Chicago, Illinois, USA

<sup>3</sup>Department of Medicine, University of Michigan, Ann Arbor, Michigan, USA

<sup>4</sup>University of Illinois College of Medicine, University of Illinois at Chicago, Chicago, Illinois, USA

<sup>5</sup>Center for Research Informatics, Biological Sciences Division, University of Chicago, Chicago, Illinois, USA

<sup>6</sup>Computation Institute, University of Chicago, Chicago, Illinois, USA

<sup>7</sup>Department of Radiology, University of Chicago, Chicago, Illinois, USA

<sup>8</sup>Department of Pathology, University of Chicago, Chicago, Illinois, USA

<sup>9</sup>Section of Cardiac and Thoracic Surgery, Department of Surgery, University of Chicago, Chicago, Illinois, USA

## Correspondence to

Ravi Salgia, University of Chicago Medical Center, 5841 S. Maryland Avenue, MC2115, Chicago, IL 60637-1470; Email: [rsalgia@medicine.bsd.uchicago.edu](mailto:rsalgia@medicine.bsd.uchicago.edu); Phone: 773-702-6613; Fax: 773-702-3002

## Abstract

**Objective** An area of need in cancer informatics is the ability to store images in a comprehensive database as part of translational cancer research. To meet this need, we have implemented a novel tandem database infrastructure that facilitates image storage and utilization.

**Background** We had previously implemented the Thoracic Oncology Program Database Project (TOPDP) database for our translational cancer research needs. While useful for many research endeavors, it is unable to store images, hence our need to implement an imaging database which could communicate easily with the TOPDP database.

**Methods** The Thoracic Oncology Research Program (TORP) imaging database was designed using the Research Electronic Data Capture (REDCap) platform, which was developed by Vanderbilt University. To demonstrate proof of principle and evaluate utility, we performed a retrospective investigation into tumor response for malignant pleural mesothelioma (MPM) patients treated at the University of Chicago Medical Center (UCMC) with either of two analogous chemotherapy regimens and consented to at least one of two UCMC IRB protocols, 9571 and 13473A.

**Results** A cohort of 22 MPM patients was identified using clinical data in the TOPDP database. After measurements were acquired, 2 representative CT images and 0-35 histological images per patient were successfully stored in the TORP database, along with clinical and demographic data.

**Discussion** We implemented the TORP imaging database to be used in conjunction with our comprehensive TOPDP database. While it requires additional effort to use two databases, our database infrastructure facilitates more comprehensive translational research.

**Conclusion** The investigation described herein demonstrates the successful implementation of this novel tandem imaging database infrastructure, as well as the potential utility of investigations enabled by it.

1  
2  
3 The data model presented here can be utilized as the basis for further development of other larger,  
4  
5 more streamlined databases in the future.  
6  
7  
8  
9

## 10 Article Summary

### 11 Article focus

- 14 • This article highlights a novel tandem thoracic oncology database infrastructure that is designed  
15 to capture radiological and histological images for translational research purposes.  
16
- 17 • To evaluate the utility of this database infrastructure, this article discusses a retrospective  
18 investigation into tumor response rates in patients with malignant pleural mesothelioma treated  
19 with one of two similar chemotherapy regimens.  
20  
21

### 22 Key messages

- 24 • This tandem database infrastructure requires some additional effort to maintain and utilize  
25 compared with a single database platform.  
26
- 27 • The extra effort required for smaller-scale studies is minimal, as demonstrated by our  
28 investigation. Moreover, this infrastructure enables more comprehensive translational research.  
29
- 30 • This data model can serve as a potential example for the development of databases that unify  
31 and streamline workflow, enabling larger-scale studies.  
32  
33

### 34 Strengths and limitations of this study

- 36 • The study was limited by a small sample size (n=22).  
37
- 38 • The study suffered from a lack of standardization: patients received a varying number of  
39 chemotherapy cycles and post-treatment CT scans were not always acquired at the same time  
40 point.  
41  
42
- 43 • Tumor response measurements were not acquired according to Modified RECIST.  
44  
45  
46  
47  
48  
49  
50  
51  
52  
53  
54  
55  
56  
57  
58  
59  
60

## Introduction

Imaging is an integral tool in oncology, aiding clinicians in diagnosing malignancies, determining appropriate therapies, and assessing treatment response. In order to maximize the utility of cancer imaging, the oncology and imaging communities have devoted significant resources to developing informatics tools that allow both clinicians and researchers to store, utilize, and share cancer images in more effective ways.[1-5] Despite these efforts, there remain areas of need in cancer imaging. One of these deficit areas is the ability to efficiently store and utilize images as a part of collaborative translational cancer research. Consequently, we sought to develop a relational database infrastructure that 1) integrated proteomic, genomic, and imaging data; 2) was easily and efficiently created, used, and adapted with little to no need for coding; and 3) could be acquired by collaborators at negligible cost.

Prior to the initiation of this effort, The Thoracic Oncology Research Program at the University of Chicago Medical Center (UCMC) had implemented the Thoracic Oncology Program Database Project (TOPDP) database for our translational research efforts.[6] Because the TOPDP database uses Microsoft Access as its underlying technology, it is technically capable of storing images. However, Access databases can only store up to 2 GB of data, so the TOPDP database does not meet our imaging storage demands. To meet this need, we designed and implemented the Thoracic Oncology Research Program (TORP) imaging database using the Research Electronic Data Capture (REDCap) database platform, which was developed by researchers at Vanderbilt University and made available to UCMC by the University of Chicago Center for Research Informatics (CRI). Due to limitations of REDCap discussed below, our TORP imaging database was not meant to replace our TOPDP database; rather, it was meant to be utilized in conjunction with the TOPDP database.

In the following paper, we evaluate the potential of utilizing the TORP imaging database alongside our TOPDP relational database. We demonstrate proof of principle using a retrospective study investigating

1  
2  
3 malignant pleural mesothelioma (MPM) patient tumor measurements in patients treated with either of  
4  
5 two analogous chemotherapy regimens. While this paper will exclusively discuss MPM, it is our hope  
6  
7 that this paper will be of general interest to oncology-related informatics as a whole.  
8  
9

## 10 11 **Background: Malignant Pleural Mesothelioma** 12

13  
14 Malignant pleural mesothelioma (MPM) is a deadly disease that affects nearly 3000 new patients  
15  
16 annually in the United States.[7] In at least 70% of cases, the disease develops secondary to asbestos  
17  
18 exposure, with a median latency period of 20 to 40 years.[7] MPM is an extremely difficult disease to  
19  
20 treat, and median overall survival (OS) ranges between 6 and 17 months, depending on histologic  
21  
22 subtype.[8] Currently, the standard chemotherapy agents for MPM are the antifolates, pemetrexed and  
23  
24 raltitrexed.[9] While pemetrexed was shown to induce moderate response (14.1%) as a single agent, it  
25  
26 demonstrated considerably higher activity (41.3% response) when used in conjunction with cisplatin.[10,  
27  
28 11] Cisplatin is sometimes poorly tolerated, especially in older patients, but it can be substituted with  
29  
30 carboplatin, a cisplatin analog which has a reduced toxicity profile.[9] Similar activity has been observed  
31  
32 between cisplatin-pemetrexed and carboplatin-pemetrexed (26.3% response vs. 21.7%,  
33  
34 respectively).[12] Imaging is critical in MPM cases because it is the primary means of assessing tumor  
35  
36 response to treatment, which often correlates to such variables as patient quality of life and overall  
37  
38 survival. Currently, computed tomography (CT) is the standard imaging modality used to assess tumor  
39  
40 response; it can be supplemented with fluorodeoxyglucose-positron emission tomography (FDG-PET) or  
41  
42 PET/CT, as well as magnetic resonance (MR) imaging.[13]  
43  
44  
45  
46  
47  
48  
49  
50  
51  
52  
53  
54  
55  
56  
57  
58  
59  
60

## Materials and Methods

### Human Subject Protection

All subjects signed a written consent for at least one of two UCMC Institutional Review Board (IRB) protocols. One is a prospective tissue-banking study that allows researchers to bank and analyze tissue from patients treated at UCMC for a thoracic malignancy. The other allows for the study of tissue which has already been collected. Although no tumor tissue analysis was performed for the present study, both protocols also allow for the abstraction of medical information and images from the patients' charts.

### Database Security Measures

Both the TOPDP and TORP databases include the protective measures necessary to ensure that they meet regulatory requirements instituted by the Health Insurance Portability and Accountability Act (HIPAA) Security Rule and HIPAA Privacy Rule.[14, 15] Microsoft Access databases do not automatically have these protective measures in place, but the TOPDP database has been amended using optional Access security features and Visual Basic for Applications (VBA) scripts to meet HIPAA regulations for databases. In particular, access to the database is restricted to an approved list of users, username and passwords are required when opening the database, the database is encrypted, and an audit trail has been created to track changes and user access. Additionally, data can be automatically de-identified before export. REDCap has inherent security measures: only approved users are given access; different users are assigned different levels of access, depending on their research needs; username and password are required; an audit trail records the time, nature, and author of a change to the database; and fields marked as identifiers can automatically be excluded when data are exported. Lastly, embedded protected health information (PHI) within images was anonymized by the University of Chicago Human Imaging Research Office (HIRO).[16]

## Informatics Infrastructure

The TOPDP database contains demographic, clinical, follow-up, proteomic, and genomic data for over 3000 patients with various thoracic malignancies. It is a relational database composed of a master Patients Table and subsidiary tables linked to the Patients Table via a field containing the patient's medical record number (MRN). Currently, subsidiary tables contain genomic and proteomic data, but new tables can be designed as needed. Related tables can be queried to display desired variables in a new table.

The Patients Table contains demographic and clinical data, as well as data regarding social, environmental, and family history. These variables follow the national standard for oncology databases established by the NCI Common Data Elements Committee, but they extend beyond standard variables to meet needs specific to the Thoracic Oncology Program.[17] Not all variables of interest are contained in the patients' medical charts; consequently, it is necessary to obtain data via a patient interview. Following the patient interview, unknown or unreported variables are abstracted from the patient's medical chart, which is also used to crosscheck patient-reported data for quality assurance purposes. Data are subsequently imported into the TOPDP database.

The TOPDP database is used not only to give a comprehensive view of all consented patients and related research performed by the lab but also to identify smaller cohorts of patients for new research projects in the context of the currently-existing IRB protocol. The Patients Table is designed to give general knowledge of patient demographics, history, and oncology care. For example, the database captures whether or not a patient has received chemotherapy and the names of the chemotherapy agents the patient has received. However, it does not capture information regarding the number or timing of chemotherapy cycles. When more detailed patient information is required for an investigation, it is abstracted from the patient's medical chart and imported into the TOPDP database in a subsidiary table.



1  
2  
3 In most cases, the TOPDP database also stores the data required for hypothesis validation after the data  
4 are generated or collected. However, in some instances, the TOPDP database is insufficient, as when  
5  
6 large files must be stored as part of the study. In this case, the TORP database can be used alongside the  
7  
8 TOPDP database. Identical tables are created in both databases, data in the TOPDP database are  
9  
10 transferred into the TORP database, and the TORP database is augmented with uploaded files (e.g.,  
11  
12 images). Figure 1 presents a chart detailing this informatics infrastructure.  
13  
14  
15  
16  
17

### 18 **Utilization of Databases for MPM Study**

19  
20  
21 Subjects were included in this retrospective study if they met the following criteria: 1) they were  
22  
23 diagnosed with MPM, 2) were subsequently treated at UCMC with two or more cycles of either  
24  
25 carboplatin-pemetrexed or cisplatin-pemetrexed, and 3) had a baseline CT scan acquired before their  
26  
27 first chemotherapy cycle and a follow-up scan acquired after their second cycle. The TOPDP database  
28  
29 was used to identify a cohort of previously-consented qualifying MPM patients. Specifically, the Patients  
30  
31 Table was filtered to display patients with MPM who had received chemotherapy and who had CT scans  
32  
33 acquired at UCMC. However, additional data (number and dates of CT scans and chemotherapy cycles)  
34  
35 were required to verify that patients met the selection criteria. These data were abstracted from the  
36  
37 patients' medical charts and then entered into a subsidiary table in the TOPDP database. A similar table  
38  
39 was then created in the TORP imaging database. Both tables were identical, with the exception that the  
40  
41 TORP database table also contained file upload fields, which were used to capture pre- and post-  
42  
43 treatment CT section images and histological images. To ensure that data were transferred correctly and  
44  
45 easily, fields were given the same names in both databases. Data were transferred from the TOPDP  
46  
47 database to the TORP database using a Microsoft Excel comma-separated values (.csv) spreadsheet as  
48  
49 an intermediary. Images were uploaded into the TORP database using REDCap's online file uploader.  
50  
51  
52  
53  
54  
55 Data were exported to Microsoft Excel for analysis.  
56  
57  
58  
59  
60

## Data Elements and Imaging

For each patient, demographic, exposure (to known MPM risk factors), and clinical data relevant to MPM were captured. Many of these data (e.g., histology, stage, treatments received, imaging acquired, vital status, etc.) are routinely captured. Variables of interest not routinely collected (for example, number, date(s), and type(s) of surgeries and chemotherapy cycles; number and date(s) of CT scans; response to treatment) were abstracted from patient charts.

As histology is integral for prognosis in MPM,[8] histological images were selected and supplied to the research team by the UCMC pathology department. Three types of images were selected: low power images, medium power images, and images with immunohistochemistry (IHC) staining. Patients had between 0 and 35 IHC images. Finally, two CT images for each patient were obtained and uploaded into the database: a representative section image from a baseline pre-treatment CT scan and an anatomically matched section image from a follow-up CT scan acquired according to clinical protocol. Follow-up images were selected from scans acquired immediately after the second cycle of treatment. If no scan was acquired immediately after cycle two, the next available scan after the second cycle of treatment was selected. While the Modified Response Evaluation Criteria in Solid Tumors (RECIST) dictates that tumor thickness be measured at two pleural lesions on three different slices at least 1 cm apart,[18] it was felt that since this study was performed as a demonstration, only one pre- and one post-treatment measurement were necessary to show proof of principle. Sample pre- and post-therapy CT section images are presented in figure 2.

Scans used for research purposes were obtained by UCMC's Human Imaging Research Office (HIRO) from the Department of Radiology's clinical image archive. After images were anonymized by the HIRO, a study investigator selected representative sections for pleural measurement. Measurement of pleural thickness was performed using a radiology software package called Abras, which was developed in-

1  
2  
3 house. Abras is image-visualization interface software that offers tools for image annotation,  
4  
5 measurement, and contouring and enables the extraction of a wide-range of image-based quantitative  
6  
7 and statistical data. It provides users with a high degree of versatility in the interaction with, and  
8  
9 manipulation of, medical images. Abras was developed to provide a cross-platform tool to rapidly  
10  
11 access, view, and evaluate images in support of medical imaging research projects.  
12  
13

## 14 15 16 17 **Results**

### 18 19 20 **Database Results**

21  
22 Using the TOPDP database, 129 consented patients with MPM were identified. 22 patients met the  
23  
24 selection criteria. For these 22 patients, data were captured in the TOPDP database and subsequently  
25  
26 transferred to the TORP database. Patient pre- and post-treatment CT scans were assessed, tumor  
27  
28 measurements were recorded, and representative images were stored in the TORP database.  
29

30  
31  
32  
33  
34  
35  
36  
37  
38  
39  
40  
41  
42  
43  
44  
45  
46  
47  
48  
49  
50  
51  
52  
53  
54  
55  
56  
57  
58  
59  
60  
Histological images were also captured.

Specific results from the study itself are detailed below. It is important to emphasize that tumor  
measurements were not acquired in accordance with Modified RECIST[18] and were only acquired at  
two time points. Consequently, these tumor measurements cannot be considered valid data from which  
to draw clinical conclusions. They are included here, nevertheless, as an example of the kind of results  
enabled by utilizing this informatics infrastructure.

## Example Results Enabled by Utilization of the TOPDP and TORP Databases to Assess Tumor Response

### Patient Characteristics

Of the 22 patients, 21 were male and 1 was female. 20 were Caucasian and 2 were African American.

Ages ranged from 47 to 80 years, with a median age of 65 years. 18 patients endorsed prior occupational and/or para-occupational asbestos exposure; 2 patients reported unknown exposure; and 2 patients did not have data regarding asbestos exposure recorded in the TOPDP database or their electronic medical records (EMRs). 16 patients were diagnosed with epithelial mesothelioma, 2 with sarcomatoid mesothelioma, and 2 with mixed-type mesothelioma. 18 patients underwent one or more surgeries: 3 patients underwent extrapleural pneumonectomy, three underwent pleurodesis, 6 underwent pleurectomy/decortication, and a further 6 underwent pleurodesis followed by pleurectomy/decortication. 11 patients were assessed by the clinician as having an ECOG performance status of 0 at their initial appointments, 8 received a score of 1, and 3 patients were given a score of 2.

### Chemotherapy Response

14 patients received two to four cycles of carboplatin-pemetrexed and 8 patients received four to six cycles of cisplatin-pemetrexed. Overall, 1 patient received two cycles, 5 patients received three cycles, 11 patients received four cycles, 2 patients received five cycles, and 3 patients received six cycles of chemotherapy. Based on the measurements generated for this study, the mean percentage change in pleural thickness for carboplatin-pemetrexed patients was -25%, indicating a 25% reduction in pleural thickness between the time points of the two CT scans, compared to -11% for cisplatin-pemetrexed patients. Of the 14 patients who received carboplatin-pemetrexed, 9 (41%) remain alive 6-28 months after commencing chemotherapy. Of the 8 patients who received cisplatin-pemetrexed, 4 (50%) remain

1  
2  
3 alive at 16-27 months after commencing chemotherapy. A brief summary of patient characteristics and  
4  
5 tumor measurements is presented in table 1.  
6  
7  
8

## 9 10 Discussion

11  
12 Informatics has been an important part of cancer research efforts to develop more effective diagnostics  
13  
14 and therapeutics. These initiatives have led to better clinical outcomes for many patients.[19, 20]  
15  
16

17  
18 However, prognosis for many patients, including those with MPM, remains poor.[19, 20] Consequently,  
19  
20 it is imperative that we continue researching novel therapeutics to combat cancer as its incidence rises  
21  
22 worldwide. To ensure that such research continues, we must develop informatics infrastructures that  
23  
24 meet research needs, one of which is an easily implementable comprehensive translational research  
25  
26 database capable of handling imaging.  
27  
28

29  
30 Relational databases that incorporate imaging have been developed by other groups,[3-5] but they  
31  
32 differ from ours in a fundamental way: ease of implementation. For example, the eDiaMoND database is  
33  
34 designed to aid clinicians and researchers by compiling mammography and related clinical data;[3] the  
35  
36 Biomedical Image Metadata Manager (BIMM) allows researchers to access and query images and  
37  
38 associated metadata;[4] and the Pathology Analytic Imaging Standards (PAIS) data model database  
39  
40 enables the storage and analysis of large TMA datasets.[5] All three of these databases are developed  
41  
42 based on published data models that can be replicated by outside groups. While implementing one of  
43  
44 these databases might be beneficial for some, they are sophisticated enough that we feel it would  
45  
46 require a dedicated informatics specialist to replicate them. Consequently, we felt the need to design a  
47  
48 simpler informatics infrastructure that incorporated imaging but did not focus on it and that would be  
49  
50 more easily implemented by translational research groups without special informatics expertise.  
51  
52  
53  
54  
55  
56  
57  
58  
59  
60

1  
2  
3 To do so, we decided to use a ready-made database platform that required little to no coding.

4  
5 Unfortunately, widely-available, readymade database platforms are often designed to meet a variety of  
6  
7  
8 research needs, but rarely ever do they meet all the needs of a specific researcher. Consequently, it was  
9  
10 necessary to utilize a tandem database infrastructure in order to incorporate imaging. Microsoft Access  
11  
12 has been a very useful platform for our translational research due to its relational nature, ease of  
13  
14 querying, portability, ease of deployment, and low cost and ubiquity, which enable collaboration with  
15  
16 institutions around the world. These features have allowed us to develop the TOPDP database, a  
17  
18 comprehensive thoracic database containing patient demographic, clinical, proteomic, and genomic  
19  
20 data in a centralized location.[6] However, Microsoft Access is not without its problems: in particular,  
21  
22 Access databases are limited to a 2 GB footprint. Thus, Access is well-suited to capture text-based data,  
23  
24 but it is limited when capturing images or other files with a large memory footprint.  
25  
26  
27  
28

29 For this reason, we developed the TORP database using the online REDCap database platform, which  
30  
31 was developed at Vanderbilt University and made available to us by the University of Chicago CRI. Like  
32  
33 Microsoft Access, the REDCap platform is well-suited to meet some of our research needs, but falls short  
34  
35 in other areas. REDCap is not relational, so the decision was made to maintain our comprehensive  
36  
37 database in Microsoft Access. However, REDCap allows up to 1 TB of storage space and so is ideal for  
38  
39 research projects utilizing large files. This capability was especially important for this research project, as  
40  
41 multiple representative images from CT scans and histological images for each patient were uploaded  
42  
43 into the database. Moreover, REDCap interacts easily with Access, communicating via Microsoft Excel or  
44  
45 an API call, and, like Access, REDCap encourages collaboration within and among institutions, as it is  
46  
47 web-based and available freely.  
48  
49  
50  
51

52  
53 In addition to facilitating more robust and novel analyses, this database structure also fosters intra- and  
54  
55 inter-institutional collaboration. Microsoft Access is widely available for a minimal cost, and REDCap is  
56  
57  
58  
59  
60

1  
2  
3 available freely online to registered users. Moreover, researchers interested in adopting the Salgia Lab's  
4  
5 TOPDP and TORP databases may access the lab's standard operating procedures (SOPs) for its  
6  
7  
8 Access[21] and REDCap[22] databases, which further detail the construction and utilization of the  
9  
10 databases and are freely available on the iBridge network. Only by developing a common infrastructure  
11  
12 will we be able to facilitate fast and easy collaboration in MPM research, which will be essential if the  
13  
14 global biomedical research community is to overtake this increasingly global disease.

15  
16  
17  
18 This informatics infrastructure is not without its limitations, however, one of which is that data must be  
19  
20 captured via patient report or chart abstraction and then manually entered into the TOPDP database.  
21  
22 This process is tedious, subject to error, and time-consuming. However, there are plans to automate this  
23  
24 process by enabling data to be transferred immediately from the patient's electronic medical record  
25  
26 (EMR), which will reduce workload and the potential for error considerably. In this investigation, data  
27  
28 were transferred easily from the Access database to REDCap using Microsoft Excel as an intermediary  
29  
30 and REDCap's data upload functionality. This method was sufficient for the purposes of the present  
31  
32 study, but if necessary or desired, it is also possible to automate the data transfer process using the  
33  
34 REDCap API. However, images must be uploaded manually using REDCap's online file upload field. The  
35  
36 time required to upload images for this investigation was negligible. However, having to upload images  
37  
38 manually would most likely be prohibitive of studies involving hundreds or thousands of patients.

39  
40  
41 Our proof of principle investigation was also limited in various ways, for one by sample size (n=22). As  
42  
43 this study was retrospective, it was also limited by a lack of standardization: when possible, we selected  
44  
45 a follow-up CT scan acquired immediately after the second cycle of chemotherapy, but for some  
46  
47 patients, follow-up CT scans were only available after the third or fourth cycle. Furthermore, some  
48  
49 patient data remained unreported because it could not be found in physician notes during chart  
50  
51  
52  
53  
54  
55  
56  
57  
58  
59  
60



1  
2  
3 abstraction. Finally, tumor measurements were not acquired using Modified RECIST, so they cannot be  
4  
5 said to be valid data from which we can draw clinical conclusions.  
6  
7

## 8 9 10 **Conclusion**

11  
12 We sought to develop a relational database infrastructure that 1) efficiently incorporated images with  
13  
14 proteomic, genomic, or other laboratory data; 2) could be implemented, used, and altered easily with  
15  
16 little knowledge of coding; 3) and was available to collaborators at minimal cost;. At first it seemed ideal  
17  
18 to capture all our imaging and laboratory data exclusively in REDCap. However, moving entirely into  
19  
20 REDCap would require giving up the relational component of our database infrastructure. Consequently,  
21  
22 we developed the TORP REDCap database to be used in tandem with our TOPDP Microsoft Access  
23  
24 database. In order to evaluate this informatics infrastructure, we performed an investigation into MPM  
25  
26 tumor response to two standard chemotherapy regimens. In large part, our investigation was a success:  
27  
28 as intended, we were able to implement a relational database that housed both laboratory and imaging  
29  
30 data using database platforms that are available at negligible cost and are easily developed and utilized.  
31  
32 However, in the course of the investigation, a limitation to our informatics model became apparent:  
33  
34 while the time required to upload images in this investigation was negligible, the fact that images must  
35  
36 be uploaded manually would most likely preclude large-scale studies. Consequently, we are now  
37  
38 working to implement an SQL database, which will be slightly more complex to develop but will enable  
39  
40 us to automate workflow and store imaging and laboratory data in a single relational database. In  
41  
42 conclusion, it is to be appreciated that this tandem database infrastructure is a very useful tool for small  
43  
44 datasets for both informaticians and non-informaticians. Moreover, one can ultimately envision utilizing  
45  
46 the data model for this infrastructure as a basis for developing a larger, more-streamlined database.  
47  
48  
49  
50  
51  
52  
53  
54  
55  
56  
57  
58  
59  
60

Table 1 Patient Characteristics and Tumor Measurements

|                                            | Number of Cases (%)* |                        |                      |
|--------------------------------------------|----------------------|------------------------|----------------------|
|                                            | Entire Patient Pool  | Carboplatin-pemetrexed | Cisplatin-pemetrexed |
| <b>Total Cases</b>                         | 22 (100)             | 14 (100)               | 8 (100)              |
| <b>Sex</b>                                 |                      |                        |                      |
| Male                                       | 21 (95)              | 14 (100)               | 7 (88)               |
| Female                                     | 1 (5)                | 0 (0)                  | 1 (13)               |
| <b>Race</b>                                |                      |                        |                      |
| Caucasian                                  | 17 (77)              | 11 (79)                | 6 (75)               |
| African American                           | 2 (9)                | 0 (0)                  | 2 (25)               |
| Unspecified                                | 3 (14)               | 3 (21)                 | 0 (0)                |
| <b>Histology</b>                           |                      |                        |                      |
| Sarcomatoid Type                           | 2 (9)                | 2 (14)                 | 0 (0)                |
| Epithelioid Type                           | 16 (73)              | 11 (79)                | 5 (63)               |
| Mixed Type                                 | 4 (18)               | 1 (7)                  | 3 (38)               |
| <b>Age at Diagnosis (years)</b>            |                      |                        |                      |
| Median                                     | 65                   | 68.5                   | 58.5                 |
| Range                                      | 47-80                | 49-80                  | 47-75                |
| <b>Performance Status</b>                  |                      |                        |                      |
| 0                                          | 11 (50)              | 9 (41)                 | 2 (9)                |
| 1                                          | 8 (36)               | 3 (14)                 | 5 (23)               |
| 2                                          | 3 (14)               | 2 (9)                  | 1 (5)                |
| <b>Vital Status at Time of Study</b>       |                      |                        |                      |
| Alive                                      | 13 (59)              | 9 (64)                 | 4 (50)               |
| Deceased                                   | 9 (41)               | 5 (36)                 | 4 (50)               |
| <b>Pleural Thickness Percentage Change</b> |                      |                        |                      |
| Mean                                       | -20%                 | -25%                   | -11%                 |
| Median                                     | -19%                 | -18%                   | -19%                 |

\*Due to rounding, percentages may not sum to 100.

## Acknowledgements and funding

The REDCap project at the University of Chicago is hosted and managed by the Center for Research Informatics and funded by the Biological Sciences Division and by the Institute for Translational Medicine, CTSA grant number UL1 RR024999 from the National Institutes of Health. Also, this work was supported in part by 5R01CA100750-08, 5R01CA125541-05, and 5R01CA129501-04 (RS). EV is supported by ASCO Translational Professorship.

## Contributions

GBC, SK, and MS drafted the manuscript. GBC, SK, MS, AK, and CER were responsible for the design, implementation, and maintenance of the TOPDP and TORP databases. ASadiq, TH, EEV, WV, HLK, and RS provided clinical knowledge and support. NB, BR, RM, and PD provided REDCap support. SGA and AStarkey created the Abras imaging software. SGA acquired radiological measurements and selected representative CT images. AH reviewed pathology slides for each patient and provided the histological images. RS oversaw the development of the databases, as well as the drafting of the manuscript.

## Competing interests

The authors have no competing interests.

## Data sharing statement

No additional data available.

## References

1. Armato SG, 3rd, McLennan G, McNitt-Gray MF, et al. Lung image database consortium: developing a resource for the medical imaging research community. *Radiology* 2004;**232**:739-48.
2. Armato SG, 3rd, Ogarek JL, Starkey A, et al. Variability in mesothelioma tumor response classification. *AJR Am J Roentgenol* 2006;**186**:1000-6.
3. Lloyd S, Jirotko M, Simpson AC, et al. Digital mammography: A world without film? *Methods Inf Med* 2005;**44**:168-71.
4. Korenblum D, Rubin D, Napel S, et al. Managing Biomedical Image Metadata for Search and Retrieval of Similar Images. *J Digit Imaging* 2011;**24**:739-48.
5. Napel SA, Beaulieu CF, Rodriguez C, et al. Automated Retrieval of CT Images of Liver Lesions on the Basis of Image Similarity: Method and Preliminary Results. *Radiology* 2010;**256**:243-52.

6. Surati M, Robinson M, Nandi S, et al. Proteomic characterization of non-small cell lung cancer in a comprehensive translational thoracic oncology database. *J Clin Bioinforma* 2011;**1**:1-11.
7. Teta MJ, Mink PJ, Lau E, et al. US mesothelioma patterns 1973-2002: indicators of change and insights into background rates. *Eur J Cancer Prev* 2008;**17**:525-34.
8. Rusch VW, Giroux D, Edwards J, et al. Initial analyses of the IASLC International Database for Malignant Pleural Mesothelioma (MPM). *Journal of Thoracic Oncology* 2009;**4**:S322-S3.
9. Campbell NP, Kindler HL. Update on Malignant Pleural Mesothelioma. *Semin Respir Crit Care Med* 2011;**32**:102-10.
10. Scagliotti GV, Shin DM, Kindler HL, et al. Phase II study of pemetrexed with and without folic acid and vitamin B12 as front-line therapy in malignant pleural mesothelioma. *J Clin Oncol* 2003;**21**:1556-61.
11. Vogelzang NJ, Rusthoven JJ, Symanowski J, et al. Phase III study of pemetrexed in combination with cisplatin versus cisplatin alone in patients with malignant pleural mesothelioma. *J Clin Oncol* 2003;**21**:2636-44.
12. Santoro A, O'Brien ME, Stahel RA, et al. Pemetrexed plus cisplatin or pemetrexed plus carboplatin for chemo-naïve patients with malignant pleural mesothelioma: results of the International Expanded Access Program. *J Thorac Oncol* 2008;**3**:756-63.
13. Wang ZJ, Reddy GP, Gotway MB, et al. Malignant pleural mesothelioma: evaluation with CT, MR imaging, and PET. *Radiographics* 2004;**24**:105-19.
14. Office of Civil Rights, U.S. Dept. of Health and Human Services, Health Insurance Reform: Security Standards: Final Rule. *Fed Regist* 2003;**68**:8334-81.
15. Office of Civil Rights, U.S. Dept. of Health and Human Services. Standards for privacy of individually identifiable health information: Final Rule. *Fed Regist* 2000;**65**:82462-829.
16. Armato SG, 3rd, Grusauskas N, MacMahon H, et al. The Human Imaging Research Office (HIRO): Advancing the role of imaging in clinical trials. *Medical Physics* 2011;**38**: 3406.
17. Patel AA, Kajdacsy-Balla A, Berman JJ, et al. The development of common data elements for a multi-institute prostate cancer tissue bank: the Cooperative Prostate Cancer Tissue Resource (CPCTR) experience. *BMC Cancer* 2005;**5**:108.
18. Byrne MJ, Nowak AK. Modified RECIST criteria for assessment of response in malignant pleural mesothelioma. *Ann Oncol* 2004;**15**:257-60.
19. Jemal A, Bray F, Center MM, et al. Global cancer statistics. *CA Cancer J Clin* 2011;**61**:69-90.
20. Siegel R, Ward E, Brawley O, et al. Cancer statistics, 2011: the impact of eliminating socioeconomic and racial disparities on premature cancer deaths. *CA Cancer J Clin* 2011;**61**:212-36.
21. Thoracic Oncology Research Program Microsoft Access Template. [cited 2011 12/01/2011]; Available from: <http://www.ibridgenetwork.org/uctech/salgia-thoracic-oncology-access-template>.
22. Thoracic Oncology Program Database Project REDCap Standard Operating Procedure. [cited 2011 12/01/2011]; Available from: <http://www.ibridgenetwork.org/uctech/salgia-thoracic-oncology-redcap-database-sop>.

1  
2  
3  
4  
5  
6  
7  
8  
9  
10  
11  
12  
13  
14  
15  
16  
17  
18  
19  
20  
21  
22  
23  
24  
25  
26  
27  
28  
29  
30  
31  
32  
33  
34  
35  
36  
37  
38  
39  
40  
41  
42  
43  
44  
45  
46  
47  
48  
49  
50  
51  
52  
53  
54  
55  
56  
57  
58  
59  
60

Figure 1. Mind map illustrating the relationships between the databases utilized for this project.

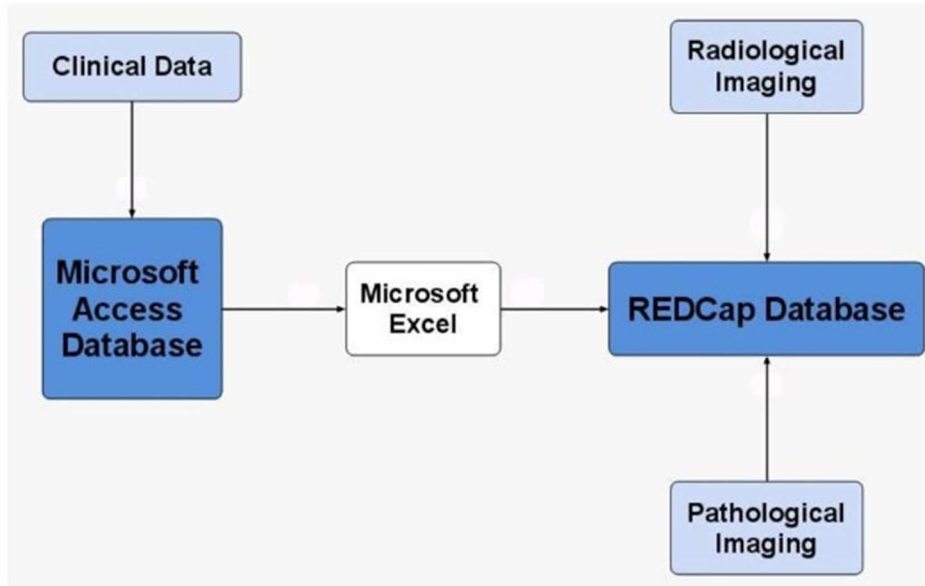

56x47mm (300 x 300 DPI)

For peer review only

**Figure 2** Example of measurement of CT scan images from a single patient. (A) CT scan image pre-cycle 1 of chemotherapy. Pleural thickness pre-treatment was 13.3 mm. (B) CT scan image post-cycle 2 of chemotherapy. Pleural thickness post-2 cycles of treatment was 9.19 mm.

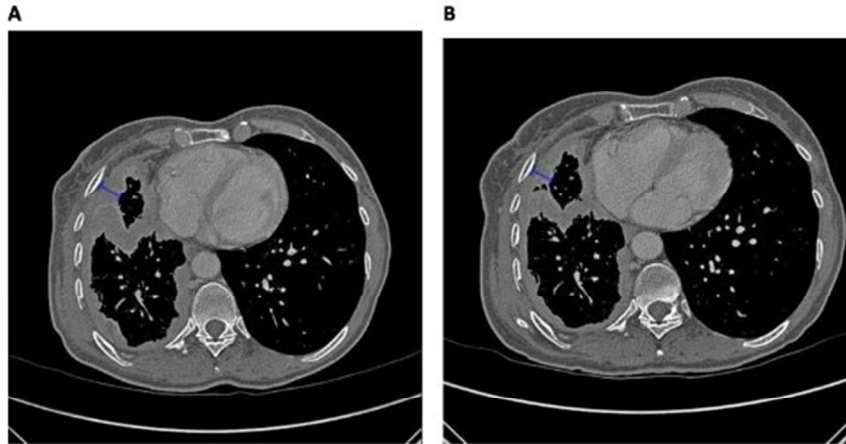

For peer review only

# Utilization of a Thoracic Oncology Database to Capture Radiological and Pathological Images for Evaluation of Response to Chemotherapy in Patients with Malignant Pleural Mesothelioma

George B. Carey<sup>1</sup>, Stephanie Kazantsev<sup>2</sup>, Mosmi Surati<sup>3</sup>, Cleo E. Rolle<sup>1</sup>, Archana Kanteti<sup>4</sup>, Ahad Sadiq<sup>1</sup>, Neil Bahroos<sup>5</sup>, Brigitte Raumann<sup>5</sup>, Ravi Madduri<sup>6</sup>, Paul Dave<sup>6</sup>, Adam Starkey<sup>7</sup>, Thomas Hensing<sup>1</sup>, Aliya N. Husain<sup>8</sup>, Everett E. Vokes<sup>1</sup>, Wickii Vigneswaran<sup>9</sup>, Samuel G. Armato, III<sup>7</sup>, Hedy L. Kindler<sup>1</sup>, Ravi Salgia<sup>1</sup>

<sup>1</sup>Section of Hematology/Oncology, Department of Medicine, University of Chicago, Chicago, Illinois, USA

<sup>2</sup>Pritzker School of Medicine, University of Chicago, Chicago, Illinois, USA

<sup>3</sup>Department of Medicine, University of Michigan, Ann Arbor, Michigan, USA

<sup>4</sup>University of Illinois College of Medicine, University of Illinois at Chicago, Chicago, Illinois, USA

<sup>5</sup>Center for Research Informatics, Biological Sciences Division, University of Chicago, Chicago, Illinois, USA

<sup>6</sup>Computation Institute, University of Chicago, Chicago, Illinois, USA

<sup>7</sup>Department of Radiology, University of Chicago, Chicago, Illinois, USA

<sup>8</sup>Department of Pathology, University of Chicago, Chicago, Illinois, USA

<sup>9</sup>Section of Cardiac and Thoracic Surgery, Department of Surgery, University of Chicago, Chicago, Illinois, USA

## Correspondence to

Ravi Salgia, University of Chicago Medical Center, 5841 S. Maryland Avenue, MC2115, Chicago, IL 60637-1470; Email: [rsalgia@medicine.bsd.uchicago.edu](mailto:rsalgia@medicine.bsd.uchicago.edu); Phone: 773-702-6613; Fax: 773-702-3002



## Abstract

**Objective** An area of need in cancer informatics is the ability to store images in a comprehensive database as part of translational cancer research. To meet this need, we have implemented a novel tandem database infrastructure that facilitates image storage and utilization.

**Background** We had previously implemented the Thoracic Oncology Program Database Project (TOPDP) database for our translational cancer research needs. While useful for many research endeavors, it is unable to store images, hence our need to implement an imaging database which could communicate easily with the TOPDP database.

**Methods** The Thoracic Oncology Research Program (TORP) imaging database was designed using the Research Electronic Data Capture (REDCap) platform, which was developed by Vanderbilt University. To demonstrate proof of principle and evaluate utility, we performed a retrospective investigation into tumor response for malignant pleural mesothelioma (MPM) patients treated at the University of Chicago Medical Center (UCMC) with either of two analogous chemotherapy regimens and consented to at least one of two UCMC IRB protocols, 9571 and 13473A.

**Results** A cohort of 22 MPM patients was identified using clinical data in the TOPDP database. After measurements were acquired, 2 representative CT images and 0-35 histological images per patient were successfully stored in the TORP database, along with clinical and demographic data.

**Discussion** We implemented the TORP imaging database to be used in conjunction with our comprehensive TOPDP database. While it requires additional effort to use two databases, our database infrastructure facilitates more comprehensive translational research.

**Conclusion** The investigation described herein demonstrates the successful implementation and ease of use of this novel tandem imaging database infrastructure, as well as the potential utility of

1  
2  
3  
4  
5  
6  
7  
8  
9  
10  
11  
12  
13  
14  
15  
16  
17  
18  
19  
20  
21  
22  
23  
24  
25  
26  
27  
28  
29  
30  
31  
32  
33  
34  
35  
36  
37  
38  
39  
40  
41  
42  
43  
44  
45  
46  
47  
48  
49  
50  
51  
52  
53  
54  
55  
56  
57  
58  
59  
60

investigations enabled by it. [The data model presented here can be utilized as the basis for further development of other larger, more streamlined databases in the future.](#)

## Article Summary

### Article focus

- This article highlights a novel tandem thoracic oncology database infrastructure that is designed to capture radiological and histological images for translational research purposes.
- To ~~evaluate~~[illustrate](#) the utility of this database infrastructure, this article discusses a retrospective investigation into tumor response rates in patients with malignant pleural mesothelioma treated with one of two similar chemotherapy regimens.

### Key messages

- This tandem database infrastructure requires some additional effort to maintain and utilize compared with a single database platform.
- ~~However, t~~he extra effort required [for smaller-scale studies](#) is minimal, as demonstrated by our [proof of concept](#) investigation. Moreover, this infrastructure enables more comprehensive translational research.
- [This data model can serve as a potential example for the development of databases that unify and streamline workflow, enabling larger-scale studies.](#)~~This database infrastructure can also be of use to translational research programs outside thoracic oncology.~~

### Strengths and limitations of this study

- The study was limited by a small sample size (n=22).
- The study suffered from a lack of standardization: patients received a varying number of chemotherapy cycles and post-treatment CT scans were not always acquired at the same time point.
- Tumor response measurements were not acquired according to Modified RECIST.

## Introduction

Imaging is an integral tool in oncology, aiding clinicians in ~~such tasks as~~ diagnosing ~~a patient's~~ malignancies, determining appropriate therapies, and assessing treatment response. In order to maximize the utility of cancer imaging, the oncology and imaging communities have devoted significant resources to developing informatics tools that allow both clinicians and researchers to store, utilize, and share cancer images in more effective ways.[1-5] ~~Despite these efforts, there remain~~ ~~Efforts to date have~~ ~~yielded many benefits, especially for clinicians and imaging specialists; however, they have yet to~~ ~~address some~~ areas of need in cancer imaging. One of these deficit areas is the ability to efficiently store and utilize images as a part of collaborative translational cancer research. ~~Consequently, we sought to~~ ~~develop a~~ relational database infrastructure that 1)- integrated proteomic, genomic, and imaging data; 2) was easily and efficiently created, used, and adapted with little to no need for coding; and 3) could be acquired by collaborators at negligible cost.

Prior to the initiation of this effort, The Thoracic Oncology Research Program at the University of Chicago Medical Center (UCMC) had ~~implemented~~ ~~we used~~ the Thoracic Oncology Program Database Project (TOPDP) database for our translational research efforts.[6] ~~The TOPDP database was developed to serve as a comprehensive translational database that interfaces with the UCMC online tissue bank and integrates patient clinical information with proteomic and genomic information obtained from tumor tissue samples.~~ Because the TOPDP database uses Microsoft Access as its underlying technology, it is technically capable of storing images. However, Access databases can only store up to 2 GB of data, so the TOPDP database does not meet our imaging storage demands. To meet this need, we ~~have~~ designed and implemented the Thoracic Oncology Research Program (TORP) imaging database using the Research Electronic Data Capture (REDCap) database platform, which was developed by researchers at Vanderbilt University and made available to UCMC by the University of Chicago Center for Research

1  
2  
3  
4  
5  
6  
7  
8  
9  
10  
11  
12  
13  
14  
15  
16  
17  
18  
19  
20  
21  
22  
23  
24  
25  
26  
27  
28  
29  
30  
31  
32  
33  
34  
35  
36  
37  
38  
39  
40  
41  
42  
43  
44  
45  
46  
47  
48  
49  
50  
51  
52  
53  
54  
55  
56  
57  
58  
59  
60

Informatics (CRI). ~~Due to limitations of REDCap discussed below, our TORP imaging database was~~ not meant to replace our TOPDP database; rather, it ~~was~~ meant to be utilized in conjunction with the TOPDP database.

In the following paper, we ~~evaluated~~ demonstrate the potential of utilizing the TORP imaging database alongside our TOPDP relational database. ~~To do this, we demonstrate~~ show proof of principle using a retrospective study investigating malignant pleural mesothelioma (MPM) patient tumor measurements in patients treated with either of two analogous chemotherapy regimens ~~(carboplatin with pemetrexed and cisplatin with pemetrexed)~~. While this paper will exclusively discuss MPM, it is our hope that this paper will be of general interest to oncology-related informatics as a whole, ~~as it highlights the types of investigations made possible by our tandem informatics infrastructure.~~

### Background: Malignant Pleural Mesothelioma

Malignant pleural mesothelioma (MPM) is a deadly disease that affects nearly 3000 new patients annually in the United States.[7] In at least 70% of cases, the disease develops secondary to asbestos exposure, with a median latency period of 20 to 40 years.[7] MPM is an extremely difficult disease to treat, and median overall survival (OS) ranges between 6 and 17 months, depending on histologic subtype.[8] Currently, the standard chemotherapy agents for MPM are the antifolates, pemetrexed and raltitrexed.[9] While pemetrexed was shown to induce moderate response (14.1%) as a single agent, it demonstrated considerably higher activity (41.3% response) when used in conjunction with cisplatin.[10, 11] Cisplatin is sometimes poorly tolerated, especially in older patients, but it can be substituted with carboplatin, a cisplatin analog which has a reduced toxicity profile.[9] Similar activity has been observed between cisplatin-pemetrexed and carboplatin-pemetrexed (26.3% response vs. 21.7%, respectively).[12] Imaging is critical in MPM cases because it is the primary means of assessing tumor response to treatment, which often correlates to such variables as patient quality of life and overall

1  
2  
3  
4  
5  
6  
7  
8  
9 survival. Currently, computed tomography (CT) is the standard imaging modality used to assess tumor  
10 response; it can be supplemented with fluorodeoxyglucose-positron emission tomography (FDG-PET) or  
11 PET/CT, as well as magnetic resonance (MR) imaging.[13]  
12  
13

## 14 15 16 **Materials and Methods**

### 17 18 19 **Subject Enrollment**

20  
21 ~~Subjects were included in this retrospective study if they met the following criteria: 1) they were~~  
22 ~~diagnosed with MPM, 2) were subsequently treated at UCMC with two or more cycles of either~~  
23 ~~carboplatin-pemetrexed or cisplatin-pemetrexed, and 3) had a baseline CT scan acquired before their~~  
24 ~~first chemotherapy cycle and a follow-up scan acquired after their second cycle. Providers decided~~  
25 ~~which regimen patients should receive. All subjects were over 18 years of age. No healthy controls were~~  
26 ~~included in this study.~~  
27  
28  
29  
30  
31  
32

### 33 34 **Human Subject Protection**

35 All subjects signed a written consent for at least one of two UCMC Institutional Review Board (IRB)  
36 protocols. One is a prospective tissue-banking study that allows researchers to bank and analyze tissue  
37 from patients treated at UCMC for a thoracic malignancy. The other allows for the study of tissue which  
38 has already been collected. Although no tumor tissue analysis was performed for the present study,  
39 both protocols also allow for the abstraction of medical information and images from the patients'  
40 charts.  
41  
42  
43  
44  
45

### 46 47 **Database Security Measures**

48 Both the TOPDP and TORP databases include the protective measures necessary to ensure that they  
49 meet ~~or exceed~~ regulatory requirements instituted by the Health Insurance Portability and  
50  
51  
52

1  
2  
3  
4  
5  
6  
7  
8  
9  
10  
11  
12  
13  
14  
15  
16  
17  
18  
19  
20  
21  
22  
23  
24  
25  
26  
27  
28  
29  
30  
31  
32  
33  
34  
35  
36  
37  
38  
39  
40  
41  
42  
43  
44  
45  
46  
47  
48  
49  
50  
51  
52  
53  
54  
55  
56  
57  
58  
59  
60

Accountability Act (HIPAA) Security Rule and HIPAA Privacy Rule.[14, 15] Microsoft Access databases do not automatically have these protective measures in place, but the TOPDP database has been amended using optional Access security features and Visual Basic for Applications (VBA) scripts to meet HIPAA regulations for databases. In particular, access to the database is restricted to an approved list of users, username and passwords are required when opening the database, the database is encrypted, and an audit trail has been created to track changes and user access. Additionally, data can be automatically de-identified before export. REDCap has inherent security measures: only approved users are given access; different users are assigned different levels of access, depending on their research needs; username and password are required; an audit trail records the time, nature, and author of a change to the database; and fields marked as identifiers can automatically be excluded when data are exported. Lastly, embedded protected health information (PHI) within images was anonymized by the University of Chicago Human Imaging Research Office (HIRO).[16]

### Informatics Infrastructure

The TOPDP database contains demographic, clinical, follow-up, proteomic, and genomic data for over 3000 patients with various thoracic malignancies. It is a relational database ~~which is~~ composed of a master Patients Table and subsidiary tables ~~which are~~ linked to the Patients Table via ~~a common field, in this case,~~ a field containing the patient's medical record number (MRN). Currently, ~~most~~ subsidiary tables contain genomic and proteomic data, but new tables can be designed as needed. Related tables can be queried to display desired variables in a new table.

~~For every patient, t~~he Patients Table contains demographic and clinical data, as well as data regarding social, environmental, and family history. These variables follow the national standard for oncology databases ~~established, as set forth~~ by the NCI Common Data Elements Committee, but they extend beyond standard variables to meet needs specific to the Thoracic Oncology Program.[17] Not all

1  
2  
3  
4  
5  
6  
7  
8  
9 variables of interest are contained in the patients' medical charts; consequently, it is necessary to obtain  
10 data via a patient interview. Following the patient interview, unknown or unreported variables are  
11 abstracted from the patient's medical chart, which is also used to crosscheck patient-reported data for  
12 quality assurance purposes. Data are subsequently imported into the TOPDP database.  
13  
14

15  
16 The TOPDP database is used not only to give a comprehensive view of all consented patients and related  
17 research performed by the lab but also to identify smaller cohorts of patients for new research projects  
18 in the context of the currently-existing IRB protocol, ~~as was done in this study and as will be described in~~  
19 ~~further detail below~~. The Patients Table is designed to give general knowledge of each patient's  
20 demographics, history, and oncology care; ~~it is not meant to be an exhaustive record~~. For example, the  
21 database captures whether or not a patient has received chemotherapy and the names of the  
22 chemotherapy agents the patient has received. However, it does not capture information regarding the  
23 number or timing of chemotherapy cycles. ~~Such detailed information is time-consuming to collect and is~~  
24 ~~generally of little utility for our research~~. When more detailed patient information is required for an  
25 investigation, it is abstracted from the patient's medical chart and imported into the TOPDP database in  
26 a subsidiary table.  
27  
28

29  
30 In most cases, the TOPDP database also stores the data required for hypothesis validation after the data  
31 are generated or collected. However, in some instances, the TOPDP database is insufficient, as when  
32 large files must be stored as part of the study. In this case, the TORP database ~~can be~~ used alongside  
33 the TOPDP database. Identical tables are created in both databases, data in the TOPDP database are  
34 transferred into the TORP database, and the TORP database is augmented with uploaded files (e.g.,  
35 images). Figure 1 presents a chart detailing ~~this our~~ informatics infrastructure.  
36  
37  
38  
39  
40  
41  
42  
43  
44  
45  
46  
47  
48  
49  
50  
51  
52  
53  
54



1  
2  
3  
4  
5  
6  
7  
8  
9  
10  
11  
12  
13  
14  
15  
16  
17  
18  
19  
20  
21  
22  
23  
24  
25  
26  
27  
28  
29  
30  
31  
32  
33  
34  
35  
36  
37  
38  
39  
40  
41  
42  
43  
44  
45  
46  
47  
48  
49  
50  
51  
52  
53  
54  
55  
56  
57  
58  
59  
60

## Utilization of Databases for MPM Study

Subjects were included in this retrospective study if they met the following criteria: 1) they were diagnosed with MPM, 2) were subsequently treated at UCMC with two or more cycles of either carboplatin-pemetrexed or cisplatin-pemetrexed, and 3) had a baseline CT scan acquired before their first chemotherapy cycle and a follow-up scan acquired after their second cycle. For the purposes of this study, the TOPDP database was used to identify a cohort of previously-consented qualifying MPM patients. Specifically, the Patients Table was filtered to display patients with MPM who had received chemotherapy and who had CT scans acquired at UCMC. However, additional data (number and dates of CT scans and chemotherapy cycles) were required to verify that patients met the selection criteria. These data were abstracted from the patients' medical charts and then entered into a subsidiary table created in the TOPDP database to capture desired variables. A similar table was then created in the TORP imaging database. Both tables were identical, with the exception that the TORP database table also contained file upload fields, which were used to capture pre- and post-treatment CT section images and histological images. To ensure that data were transferred correctly and easily, fields were given the same names in both databases. Data were transferred from the TOPDP database to the TORP database using a Microsoft Excel comma-separated values (.csv) spreadsheet as an intermediary. Images were uploaded into the TORP database using REDCap's online file uploader. Data were exported to Microsoft Excel for analysis.

## Data Elements and Imaging

For each patient, demographic, exposure (to known MPM risk factors), and clinical data relevant to MPM were captured. Many of these data (e.g., histology, stage, grade, treatments received, imaging acquired, vital status, Eastern Cooperative Oncology Group (ECOG) performance status at time of first visit, etc.) are routinely captured for all patients entered into the database. However, some variables of

1  
2  
3  
4  
5  
6  
7  
8  
9 interest ~~are~~ not routinely collected (for example, number, date(s), and type(s) of surgeries and  
10 chemotherapy cycles; number and date(s) of CT scans; response to treatment), ~~as they are not~~  
11 ~~necessary for most of the investigations performed by the lab. These variables~~ were abstracted from  
12 patient charts collected for subjects included in this study via chart abstraction after an initial cohort of  
13 ~~subjects was identified.~~  
14  
15  
16  
17  
18 ~~In addition, a~~ histology is integral for prognosis in MPM,[8] histological images were selected and  
19 supplied to the research team by the UCMC pathology department. Three types of images were  
20 selected: low power images, medium power images, and images with immunohistochemistry (IHC)  
21 staining. Patients had between 0 and 35 IHC images. ~~Example pathological images can be found in figure~~  
22 ~~2.~~ Finally, two CT images for each patient were obtained and uploaded into the database: a  
23 representative section image from a baseline pre-treatment CT scan and an anatomically matched  
24 section image from a follow-up CT scan acquired according to clinical protocol. Follow-up images were  
25 selected from scans acquired immediately after the second cycle of treatment. If no scan was acquired  
26 immediately after cycle two, the next available scan after the second cycle of treatment was selected.  
27 While the Modified Response Evaluation Criteria in Solid Tumors (RECIST) dictates that tumor thickness  
28 be measured at two pleural lesions on three different slices at least 1 cm apart,[18] it was felt that since  
29 this study was performed as a demonstration, only one pre- and one post-treatment measurement were  
30 necessary to show proof of principle. Sample pre- and post-therapy CT section images are presented in  
31 figure ~~2~~3.  
32  
33  
34  
35  
36  
37  
38  
39  
40  
41  
42  
43  
44  
45 Scans used for research purposes were obtained by UCMC's Human Imaging Research Office (HIRO)  
46 from the Department of Radiology's clinical image archive. After images were anonymized by the HIRO,  
47 a study investigator selected representative sections for pleural measurement. Measurement of pleural  
48 thickness was performed using a radiology software package called Abras, which was developed in-

1  
2  
3  
4  
5  
6  
7  
8  
9  
10  
11  
12  
13  
14  
15  
16  
17  
18  
19  
20  
21  
22  
23  
24  
25  
26  
27  
28  
29  
30  
31  
32  
33  
34  
35  
36  
37  
38  
39  
40  
41  
42  
43  
44  
45  
46  
47  
48  
49  
50  
51  
52  
53  
54  
55  
56  
57  
58  
59  
60

house. Abras is image-visualization interface software that offers tools for image annotation, measurement, and contouring and enables the extraction of a wide-range of image-based quantitative and statistical data. It provides users with a high degree of versatility in the interaction with, and manipulation of, medical images. Abras was developed to provide a cross-platform tool to rapidly access, view, and evaluate images in support of medical imaging research projects.

## Results

### Database Results

Using the TOPDP database, 129 consented patients with MPM were identified. 22 patients met the selection criteria. For these 22 patients, data were captured in the TOPDP database and subsequently transferred to the TORP database. Patient pre- and post-treatment CT scans were assessed, tumor measurements were recorded, and representative images were stored in the TORP database. ~~Lastly,~~ ~~h~~istological images were also captured ~~for future research use.~~

Specific results from the study itself are detailed below. It is important to emphasize that tumor measurements were not acquired in accordance with Modified RECIST[18] and were only acquired at two time points. Consequently, these tumor measurements cannot be considered valid data from which to draw clinical conclusions. They are included here, nevertheless, as an example of the kind of results enabled by utilizing this informatics infrastructure.

## Example Results Enabled by Utilization of the TOPDP and TORP Databases to Assess Tumor Response

### Patient Characteristics

~~Patient characteristics are listed in Table 1.~~ Of the 22 patients, 21 were male and 1 was female. 20 were Caucasian and 2 were African American. Ages ranged from 47 to 80 years, with a median age of 65 years. 18 patients endorsed prior occupational and/or para-occupational asbestos exposure; 2 patients reported unknown exposure; and 2 patients did not have data regarding asbestos exposure recorded in the TOPDP database or their electronic medical records (EMRs). 16 patients were diagnosed with epithelial mesothelioma, 2 with sarcomatoid mesothelioma, and 2 with mixed-type mesothelioma. 18 patients underwent one or more surgeries: 3 patients underwent extrapleural pneumonectomy, three underwent pleurodesis, 6 underwent pleurectomy/decortication, and a further 6 underwent pleurodesis followed by pleurectomy/decortication. 11 patients were assessed by the clinician as having an ECOG performance status of 0 at their initial appointments, 8 received a score of 1, and 3 patients were given a score of 2.

### Chemotherapy Response

~~Table 2 summarizes chemotherapy details and patient outcome by chemotherapy regimen. Table 3 provides more detailed data regarding pleural measurements for each patient.~~ 14 patients received two to four cycles of carboplatin-pemetrexed and 8 patients received four to six cycles of cisplatin-pemetrexed. Overall, 1 patient received two cycles, 5 patients received three cycles, 11 patients received four cycles, 2 patients received five cycles, and 3 patients received six cycles of chemotherapy. Based on the measurements generated for this study, the mean percentage change in pleural thickness for carboplatin-pemetrexed patients was -25%, indicating a 25% reduction in pleural thickness between the time points of the two CT scans, compared to -11% for cisplatin-pemetrexed patients. Of the 14

1  
2  
3  
4  
5  
6  
7  
8  
9  
10  
11  
12  
13  
14  
15  
16  
17  
18  
19  
20  
21  
22  
23  
24  
25  
26  
27  
28  
29  
30  
31  
32  
33  
34  
35  
36  
37  
38  
39  
40  
41  
42  
43  
44  
45  
46  
47  
48  
49  
50  
51  
52  
53  
54  
55  
56  
57  
58  
59  
60

patients who received carboplatin-pemetrexed, 9 (41%) remain alive 6-28 months after commencing chemotherapy. Of the 8 patients who received cisplatin-pemetrexed, 4 (50%) remain alive at 16-27 months after commencing chemotherapy. [A brief summary of patient characteristics and tumor measurements is presented in table 1.](#)

## Discussion

Informatics has been an important part of cancer research efforts to develop more effective diagnostics and therapeutics. These initiatives have led to better clinical outcomes for many patients.[19, 20]

However, prognosis for many patients, including those with MPM, remains poor.[19, 20] Consequently, it is imperative that we continue researching novel therapeutics to combat cancer as its incidence rises

worldwide. To ensure that such research continues, we must develop informatics infrastructures that

meet research needs, [one of which is an easily implementable comprehensive translational research database capable of handling imaging.](#)

[Relational databases that incorporate imaging have been developed by other groups,\[3-5\] but they differ from ours in a fundamental way: ease of implementation. For example, the eDiaMoND database is designed to aid clinicians and researchers by compiling mammography and related clinical data:\[3\] the Biomedical Image Metadata Manager \(BIMM\) allows researchers to access and query images and associated metadata:\[4\] and the Pathology Analytic Imaging Standards \(PAIS\) data model database enables the storage and analysis of large TMA datasets.\[5\] All three of these databases are developed based on published data models that can be replicated by outside groups. While implementing one of these databases might be beneficial for some, they are sophisticated enough that we feel it would require a dedicated informatics specialist to replicate them. Consequently, we felt the need to design a](#)

1  
2  
3  
4  
5  
6  
7  
8  
9 simpler informatics infrastructure that incorporated imaging but did not focus on it and that would be  
10 more easily implemented by translational research groups without special informatics expertise.

11  
12 To do so, we decided to use a ready-made database platform that required little to no coding.

13  
14  
15 Unfortunately, widely-available, readymade database platforms are often designed to meet a variety of  
16  
17 research needs, but rarely ever do they meet all the needs of a specific researcher. Consequently, it ~~is~~  
18 ~~sometimes necessary, as in this case, was necessary~~ to utilize a tandem database infrastructures in order  
19 to incorporate imaging~~undertake certain research projects~~. Microsoft Access has been a very useful  
20  
21 platform for our translational research due to its relational nature, ease of querying, portability, ease of  
22  
23 deployment, and low cost and ubiquity, which enable collaboration with institutions around the world.

24  
25 These features have allowed us to develop the TOPDP database, a comprehensive thoracic database  
26  
27 containing patient demographic, clinical, proteomic, and genomic data in a centralized location.[6]

28  
29 However, Microsoft Access is not without its problems: in particular, Access databases are limited to a 2  
30  
31 GB footprint. Thus, Access is well-suited to capture text-based data, but it is limited when capturing  
32  
33 images or other files with a large memory footprint.

34  
35  
36 For this reason, we developed the TORP database using the online REDCap database platform, which  
37  
38 was developed at Vanderbilt University and made available to us by the University of Chicago CRI. Like  
39  
40 Microsoft Access, the REDCap platform is well-suited to meet some of our research needs, but falls short  
41  
42 in other areas. REDCap is not relational, so the decision was made to maintain our comprehensive  
43  
44 database in Microsoft Access. However, REDCap allows up to 1 TB of storage space and so is ideal for  
45  
46 research projects utilizing large files. This capability was especially important for this research project, as  
47  
48 multiple representative images from CT scans and histological images for each patient were uploaded  
49  
50 into the database. Moreover, REDCap interacts easily with Access, communicating via Microsoft Excel or

1  
2  
3  
4  
5  
6  
7  
8  
9  
10  
11  
12  
13  
14  
15  
16  
17  
18  
19  
20  
21  
22  
23  
24  
25  
26  
27  
28  
29  
30  
31  
32  
33  
34  
35  
36  
37  
38  
39  
40  
41  
42  
43  
44  
45  
46  
47  
48  
49  
50  
51  
52  
53  
54  
55  
56  
57  
58  
59  
60

an API call, and, like Access, REDCap encourages collaboration within and among institutions, as it is web-based and available freely.

In addition to facilitating more robust and novel analyses, this database structure also fosters intra- and inter-institutional collaboration. Microsoft Access is widely available for a minimal cost, and REDCap is available freely online to registered users. Moreover, researchers interested in adopting the Salgia Lab's TOPDP and TORP databases may access the lab's standard operating procedures (SOPs) for its Access[21] and REDCap[22] databases, which further detail the construction and utilization of the databases and are freely available on the iBridge network. Only by developing a common infrastructure will we be able to facilitate fast and easy collaboration in MPM research, which will be essential if the global biomedical research community is to overtake this increasingly global disease.

This informatics infrastructure is not without its limitations, however, one of which is that data must be captured via patient report or chart abstraction and then manually entered into the TOPDP database. This process is tedious, subject to error, and time-consuming. However, there are plans to automate this process by enabling data to be transferred immediately from the patient's electronic medical record (EMR), which will reduce workload and the potential for error considerably. In this investigation, data were transferred easily from the Access database to REDCap using Microsoft Excel as an intermediary and REDCap's data upload functionality. This method was sufficient for the purposes of the present study, but if necessary or desired, it is also possible to automate the data transfer process using the REDCap API. However, images must be uploaded manually using REDCap's online file upload field. The time required to upload images for this investigation was negligible. However, having to upload images manually would most likely be prohibitive of studies involving hundreds or thousands of patients.



## Limitations

### Study Limitations

~~While the TOPDP database has information on over 3000 patients, t~~

~~Our proof of principle investigation was also limited in various ways, for one he study was limited by~~  
sample size (n=22). ~~Only 22 patients met the inclusion criteria requiring that patients were diagnosed~~  
~~with MPM, treated with at least two cycles of carboplatin-pemetrexed or cisplatin-pemetrexed, and had~~  
~~CT scans acquired prior to and following two cycles of chemotherapy treatment.~~ As this study was  
retrospective, it was also limited by a lack of standardization: when possible, we selected a follow-up CT  
scan acquired immediately after the second cycle of chemotherapy, but for some patients, follow-up CT  
scans were only available after the third or fourth cycle. ~~Additionally, patients received different~~  
~~numbers of chemotherapy cycles.~~ Furthermore, ~~due to the study's retrospective nature,~~ some patient  
data remained unreported because it could not be found in physician notes during chart abstraction.  
Finally, tumor measurements were not acquired using Modified RECIST, so they cannot be said to be  
valid data from which we can draw clinical conclusions.

### Informatics Limitations

~~Data were transferred easily from the Access to REDCap databases using Microsoft Excel as an~~  
~~intermediary and REDCap's data upload functionality. This method was sufficient for the purposes of the~~  
~~present study, but if necessary or desired, it is also possible to automate the data transfer process using~~  
~~the REDCap API. One limitation of the current informatics infrastructure is that data must be captured~~  
~~via either patient report or chart abstraction and then manually entered into the TOPDP database. This~~  
~~process is tedious, subject to error, and time-consuming. However, there are plans to automate this~~  
~~process by enabling data to be transferred immediately from the patient's EMR, which will reduce~~  
~~workload and the potential for error considerably.~~

## Conclusion

We sought to develop a relational database infrastructure that 1) efficiently incorporated images with proteomic, genomic, or other laboratory data; 2) could be implemented, used, and altered easily with little knowledge of coding; 3) and was available to collaborators at minimal cost; . Informatics must continue to enable more robust cancer research by meeting evolving research needs. One of these needs has been the ability to utilize and store imaging as a part of translational cancer research. To fill this deficit area, we have implemented a novel tandem database using our TOPDP and TORP databases. At first it seemed ideal to capture all our imaging and laboratory data exclusively in REDCap. However, moving entirely into REDCap would require giving up the relational component of our database infrastructure. Consequently, we developed the TORP REDCap database to be used in tandem with our TOPDP Microsoft Access database. In order to evaluate this informatics infrastructure, we performed an investigation into MPM tumor response to two standard chemotherapy regimens. In large part, our investigation was a success: as intended, we were able to implement a relational database that housed both laboratory and imaging data using database platforms that are available at negligible cost and are easily developed and utilized. However, in the course of the investigation, a limitation to our informatics model became apparent: while the time required to upload images in this investigation was negligible, the fact that images must be uploaded manually would most likely preclude large-scale studies. Consequently, we are now working to implement an SQL database, which will be slightly more complex to develop but will enable us to automate workflow and store imaging and laboratory data in a single relational database. In conclusion, it is to be appreciated that this tandem database infrastructure is a very useful tool for small datasets for both informaticians and non-informaticians. Moreover, one can ultimately envision utilizing the data model for this infrastructure as a basis for developing a larger, more-streamlined database. While our focus has been thoracic malignancies, it is our hope that this

1  
2  
3  
4  
5  
6  
7  
8  
9  
10  
11  
12  
13  
14  
15  
16  
17  
18  
19  
20  
21  
22  
23  
24  
25  
26  
27  
28  
29  
30  
31  
32  
33  
34  
35  
36  
37  
38  
39  
40  
41  
42  
43  
44  
45  
46  
47  
48  
49  
50  
51  
52  
53  
54  
55  
56  
57  
58  
59  
60

example investigation has illustrated the potential of our informatics infrastructure for use in cancer research as a whole.

For peer review only

## Supplementary Tables and Figures

**Table 1 Patient Characteristics**

|                                 | <b>Number of Cases (%)</b> |
|---------------------------------|----------------------------|
| <b>Total Cases</b>              | 22 (100)                   |
| <b>Sex</b>                      |                            |
| Male                            | 21 (95)                    |
| Female                          | 1 (5)                      |
| <b>Race</b>                     |                            |
| Caucasian                       | 17 (77)                    |
| African American                | 2 (9)                      |
| Other                           | 0 (0)                      |
| Unspecified                     | 3 (14)                     |
| <b>Histology</b>                |                            |
| Mesothelioma—Sarcomatoid Type   | 2 (9)                      |
| Mesothelioma—Epithelioid Type   | 16 (73)                    |
| Mesothelioma—Mixed Type         | 4 (18)                     |
| <b>Asbestos Exposure</b>        |                            |
| Occupational/Para-Occupational  | 18 (82)                    |
| Unknown                         | 2 (9)                      |
| Not Reported                    | 2 (9)                      |
| <b>Age at Diagnosis (years)</b> |                            |
| Median                          | 65                         |
| Range                           | 47-80                      |

\*Some patient underwent more than one procedure.

Table 12—Patient Characteristics and Chemotherapy Details Tumor Measurements

|                                            | Number of Cases (%)* |                        |                      |
|--------------------------------------------|----------------------|------------------------|----------------------|
|                                            | Entire Patient Pool  | Carboplatin-pemetrexed | Cisplatin-pemetrexed |
| <b>Total Cases</b>                         | <b>22 (100)</b>      | <b>14 (100)</b>        | <b>8 (100)</b>       |
| <b>Sex</b>                                 |                      |                        |                      |
| Male                                       | 21 (95)              | 14 (100)               | 7 (88)               |
| Female                                     | 1 (5)                | 0 (0)                  | 1 (13)               |
| <b>Race</b>                                |                      |                        |                      |
| Caucasian                                  | 17 (77)              | 11 (79)                | 6 (75)               |
| African American                           | 2 (9)                | 0 (0)                  | 2 (25)               |
| Unspecified                                | 3 (14)               | 3 (21)                 | 0 (0)                |
| <b>Histology</b>                           |                      |                        |                      |
| Sarcomatoid Type                           | 2 (9)                | 2 (14)                 | 0 (0)                |
| Epithelioid Type                           | 16 (73)              | 11 (79)                | 5 (63)               |
| Mixed Type                                 | 4 (18)               | 1 (7)                  | 3 (38)               |
| <b>Age at Diagnosis (years)</b>            |                      |                        |                      |
| Median                                     | 65                   | 68.5                   | 58.5                 |
| Range                                      | 47-80                | 49-80                  | 47-75                |
| <b>Performance Status</b>                  |                      |                        |                      |
| 0                                          | 11 (50)              | 9 (41)                 | 2 (9)                |
| 1                                          | 8 (36)               | 3 (14)                 | 5 (23)               |
| 2                                          | 3 (14)               | 2 (9)                  | 1 (5)                |
| <b>Vital Status at Time of Study</b>       |                      |                        |                      |
| Alive                                      | 13 (59)              | 9 (64)                 | 4 (50)               |
| Deceased                                   | 9 (41)               | 5 (36)                 | 4 (50)               |
| <b>Pleural Thickness Percentage Change</b> |                      |                        |                      |
| Mean                                       | -20%                 | -25%                   | -11%                 |
| Median                                     | -19%                 | -18%                   | -19%                 |

\*Due to rounding, percentages may not sum to 100.

1  
2  
3  
4  
5  
6  
7  
8  
9  
10  
11  
12  
13  
14  
15  
16  
17  
18  
19  
20  
21  
22  
23  
24  
25  
26  
27  
28  
29  
30  
31  
32  
33  
34  
35  
36  
37  
38  
39  
40  
41  
42  
43  
44  
45  
46  
47  
48  
49  
50  
51  
52  
53  
54  
55  
56  
57  
58  
59  
60

Table 3-Chemotherapy response details

| Patient ID | Chemo-therapy Regimen* | Chemo-therapy Total Cycles | Follow-Up CT-Scan Post-Cycle | Pleural Thickness Pre-Cycle 1 (mm) | Pleural Thickness Follow-Up CT-Scan (mm) | Difference in-Pleural Thickness (mm) |
|------------|------------------------|----------------------------|------------------------------|------------------------------------|------------------------------------------|--------------------------------------|
| 1          | Cis/Pem                | 4                          | 4                            | 6.96                               | 4.39                                     | -2.57                                |
| 2          | Cis/Pem                | 4                          | 2                            | 19.67                              | 17.06                                    | -2.61                                |
| 3          | Cis/Pem                | 6                          | 2                            | 10.83                              | 8.61                                     | -2.22                                |
| 4          | Cis/Pem                | 4                          | 2                            | 34.53                              | 28.29                                    | -6.24                                |
| 5          | Cis/Pem                | 5                          | 2                            | 16.06                              | 12.75                                    | -3.31                                |
| 6          | Cis/Pem                | 6                          | 2                            | 25.28                              | 17.01                                    | -8.27                                |
| 7          | Cis/Pem                | 5                          | 2                            | 24.00                              | 33.47                                    | 9.47                                 |
| 8          | Cis/Pem                | 6                          | 2                            | 10.50                              | 12.10                                    | 1.60                                 |
| 9          | Carbo/Pem              | 4                          | 2                            | 16.75                              | 14.21                                    | -2.54                                |
| 10         | Carbo/Pem              | 4                          | 2                            | 18.94                              | 12.52                                    | -6.42                                |
| 11         | Carbo/Pem              | 3                          | 2                            | 13.30                              | 9.19                                     | -4.11                                |
| 12         | Carbo/Pem              | 3                          | 3                            | 41.82                              | 44.29                                    | 2.47                                 |
| 13         | Carbo/Pem              | 4                          | 4                            | 13.44                              | 7.16                                     | -6.28                                |
| 14         | Carbo/Pem              | 4                          | 3                            | 41.04                              | 30.94                                    | -10.10                               |
| 15         | Carbo/Pem              | 2                          | 2                            | 48.65                              | 9.47                                     | -39.18                               |
| 16         | Carbo/Pem              | 4                          | 4                            | 5.59                               | 5.12                                     | -0.47                                |
| 17         | Carbo/Pem              | 4                          | 2                            | 21.89                              | 19.68                                    | -2.21                                |
| 18         | Carbo/Pem              | 4                          | 4                            | 28.59                              | 22.70                                    | -5.89                                |
| 19         | Carbo/Pem              | 3                          | 3                            | 23.61                              | 21.87                                    | -1.74                                |
| 20         | Carbo/Pem              | 3                          | 3                            | 13.46                              | 12.12                                    | -1.34                                |
| 21         | Carbo/Pem              | 3                          | 3                            | 20.35                              | 19.30                                    | -1.05                                |
| 22         | Carbo/Pem              | 4                          | 4                            | 6.30                               | 2.65                                     | -3.65                                |
| Average    | Cis/Pem                | 5                          | 2.25                         | 18.48                              | 16.71                                    | -1.77                                |
| Average    | Carbo/Pem              | 3.5                        | 2.93                         | 22.41                              | 16.52                                    | -5.89                                |

\*Abbreviations: Carbo, carboplatin; Cis, cisplatin; Pem, pemetrexed

1  
2  
3  
4  
5  
6  
7  
8  
9  
10  
11  
12  
13  
14  
15  
16  
17  
18  
19  
20  
21  
22  
23  
24  
25  
26  
27  
28  
29  
30  
31  
32  
33  
34  
35  
36  
37  
38  
39  
40  
41  
42  
43  
44  
45  
46  
47  
48  
49  
50  
51  
52  
53  
54  
55  
56  
57  
58  
59  
60

|

For peer review only

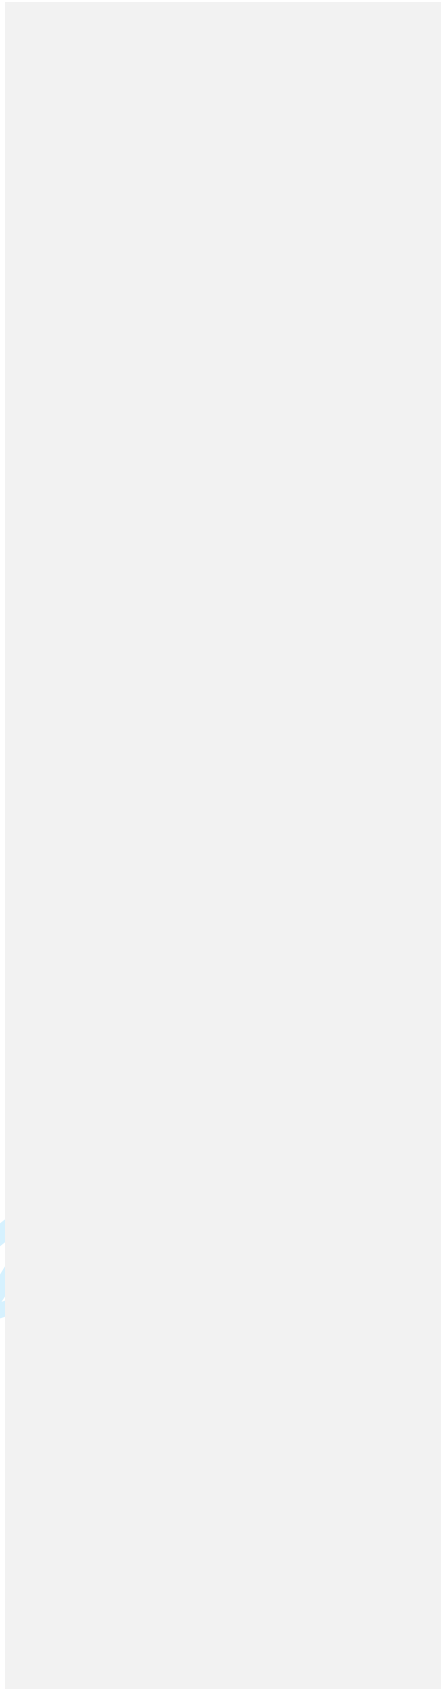



1  
2  
3  
4  
5  
6  
7  
8  
9  
10  
11  
12  
13  
14  
15  
16  
17  
18  
19  
20  
21  
22  
23  
24  
25  
26  
27  
28  
29  
30  
31  
32  
33  
34  
35  
36  
37  
38  
39  
40  
41  
42  
43  
44  
45  
46  
47  
48  
49  
50  
51  
52  
53  
54  
55  
56  
57  
58  
59  
60

## Acknowledgements and funding

The REDCap project at the University of Chicago is hosted and managed by the Center for Research Informatics and funded by the Biological Sciences Division and by the Institute for Translational Medicine, CTSA grant number UL1 RR024999 from the National Institutes of Health. Also, this work was supported in part by 5R01CA100750-08, 5R01CA125541-05, and 5R01CA129501-04 (RS). EV is supported by ASCO Translational Professorship.

## Contributions

GBC, SK, and MS drafted the manuscript. GBC, SK, MS, AK, and CER were responsible for the design, implementation, and maintenance of the TOPDP and TORP databases. ASadiq, TH, EEV, WV, HLK, and RS provided clinical knowledge and support. NB, BR, RM, and PD provided REDCap support. SGA and AStarkey created the Abras imaging software. SGA acquired radiological measurements and selected representative CT images. AH reviewed pathology slides for each patient and provided the histological images. RS oversaw the development of the databases, as well as the drafting of the manuscript.

## Competing interests

The authors have no competing interests.

## Data sharing statement

No additional data available.

## References

1. Armato SG, 3rd, McLennan G, McNitt-Gray MF, et al. Lung image database consortium: developing a resource for the medical imaging research community. *Radiology* 2004;**232**:739-48.
2. Armato SG, 3rd, Ogarek JL, Starkey A, et al. Variability in mesothelioma tumor response classification. *AJR Am J Roentgenol* 2006;**186**:1000-6.
3. Lloyd S, Jirotko M, Simpson AC, et al. Digital mammography: A world without film? *Methods Inf Med* 2005;**44**:168-71.
4. Korenblum D, Rubin D, Napel S, et al. Managing Biomedical Image Metadata for Search and Retrieval of Similar Images. *J Digit Imaging* 2011;**24**:739-48.
5. Napel SA, Beaulieu CF, Rodriguez C, et al. Automated Retrieval of CT Images of Liver Lesions on the Basis of Image Similarity: Method and Preliminary Results. *Radiology* 2010;**256**:243-52.

**Formatted:** Font: (Default) Calibri, 11 pt, Not Bold, Font color: Auto, English (U.S.), Highlight

**Formatted:** Highlight

**Formatted:** Font: (Default) Calibri, 11 pt, Not Bold, Font color: Auto, English (U.S.), Highlight

6. Surati M, Robinson M, Nandi S, et al. Proteomic characterization of non-small cell lung cancer in a comprehensive translational thoracic oncology database. *J Clin Bioinforma* 2011;**1**:1-11.
7. Teta MJ, Mink PJ, Lau E, et al. US mesothelioma patterns 1973-2002: indicators of change and insights into background rates. *Eur J Cancer Prev* 2008;**17**:525-34.
8. Rusch VW, Giroux D, Edwards J, et al. Initial analyses of the IASLC International Database for Malignant Pleural Mesothelioma (MPM). *Journal of Thoracic Oncology* 2009;**4**:S322-S3.
9. Campbell NP, Kindler HL. Update on Malignant Pleural Mesothelioma. *Semin Respir Crit Care Med* 2011;**32**:102-10.
10. Scagliotti GV, Shin DM, Kindler HL, et al. Phase II study of pemetrexed with and without folic acid and vitamin B12 as front-line therapy in malignant pleural mesothelioma. *J Clin Oncol* 2003;**21**:1556-61.
11. Vogelzang NJ, Rusthoven JJ, Symanowski J, et al. Phase III study of pemetrexed in combination with cisplatin versus cisplatin alone in patients with malignant pleural mesothelioma. *J Clin Oncol* 2003;**21**:2636-44.
12. Santoro A, O'Brien ME, Stahel RA, et al. Pemetrexed plus cisplatin or pemetrexed plus carboplatin for chemo-naïve patients with malignant pleural mesothelioma: results of the International Expanded Access Program. *J Thorac Oncol* 2008;**3**:756-63.
13. Wang ZJ, Reddy GP, Gotway MB, et al. Malignant pleural mesothelioma: evaluation with CT, MR imaging, and PET. *Radiographics* 2004;**24**:105-19.
14. Office of Civil Rights, U.S. Dept. of Health and Human Services, Health Insurance Reform: Security Standards: Final Rule. *Fed Regist* 2003;**68**:8334-81.
15. Office of Civil Rights, U.S. Dept. of Health and Human Services. Standards for privacy of individually identifiable health information: Final Rule. *Fed Regist* 2000;**65**:82462-829.
16. Armato SG, 3rd, Grusauskas N, MacMahon H, et al. The Human Imaging Research Office (HIRO): Advancing the role of imaging in clinical trials. *Medical Physics* 2011;**38**: 3406.
17. Patel AA, Kajdacsy-Balla A, Berman JJ, et al. The development of common data elements for a multi-institute prostate cancer tissue bank: the Cooperative Prostate Cancer Tissue Resource (CPCTR) experience. *BMC Cancer* 2005;**5**:108.
18. Byrne MJ, Nowak AK. Modified RECIST criteria for assessment of response in malignant pleural mesothelioma. *Ann Oncol* 2004;**15**:257-60.
19. Jemal A, Bray F, Center MM, et al. Global cancer statistics. *CA Cancer J Clin* 2011;**61**:69-90.
20. Siegel R, Ward E, Brawley O, et al. Cancer statistics, 2011: the impact of eliminating socioeconomic and racial disparities on premature cancer deaths. *CA Cancer J Clin* 2011;**61**:212-36.
21. Thoracic Oncology Research Program Microsoft Access Template. [cited 2011 12/01/2011]; Available from: <http://www.ibridgenetwork.org/uctech/salgia-thoracic-oncology-access-template>.
22. Thoracic Oncology Program Database Project REDCap Standard Operating Procedure. [cited 2011 12/01/2011]; Available from: <http://www.ibridgenetwork.org/uctech/salgia-thoracic-oncology-redcap-database-sop>.
